# Supplementary material for: A CRISPR/Cas9-mediated screen identifies determinants of early plasma cell differentiation
Source: Front Immunol. 2023 Jan 5;13:1083119. doi: 10.3389/fimmu.2022.1083119 (PMC9849354; doi:10.3389/fimmu.2022.1083119)
Supplement: Supplementary Table 3 — Correlation of survival/proliferation and differentiation scores. [file Table_3.xlsx]

## Sheet: Experiment 1
Legend: the table showing the correlation of survival/proliferation and differentiation scores from experiment #1 as depicted in main Figure 1.
SgRNAs name	Sur/Pro score	Diff score
ABCA1_1	0.16	-0.23072
ABCA1_2	0.15	-0.11031
ABCA1_3	0.29	-0.17025
ACADVL_1	-0.18	-0.1982
ACADVL_2	-0.24	-0.04485
ACADVL_3	-0.28	-0.03358
ACKR3_1	0.23	-0.09378
ACKR3_2	0.16	-0.24986
ACKR3_3	0.13	-0.13947
ACTL6A_1	-1.6	-0.23848
ACTL6A_2	-0.05	-0.26242
ACTL6A_3	-1.66	-0.1962
ACTL6B_1	-0.04	-0.12609
ACTL6B_2	0.03	-0.26949
ACTL6B_3	-0.03	-0.13782
ACTR2_1	-2.1	-0.56009
ACTR2_2	-0.96	-0.42616
ACTR2_3	-0.83	-0.29775
ACTR3_1	-0.92	-0.44374
ACTR3_2	-1.4	-0.49944
ACTR3_3	-1.01	-0.53488
ALG1	-5.52	0
ALG11	-5.08	-0.45303
ALG12	-1.38	-0.39472
ALG14	-4.08	-0.152
ALG2	-5.87	-0.3958
ALG3	-0.5	-0.12017
ALG5	-0.67	-0.08496
ALG6	-1.52	-0.19912
ALG8	-1.2	-0.20325
ALPL_1	0.21	-0.17827
ALPL_2	0.06	-0.2036
ALPL_3	0.28	-0.21562
ALS2_1	-0.31	0.01457
ALS2_2	-0.24	-0.06501
ALS2_3	-0.42	-0.36728
AP1S1	-0.62	-0.04939
AP3D1	-0.64	-0.04233
AP3M1	-0.12	0.07534
AP3S1	-0.19	-0.05215
AP3S2	-0.23	-0.15284
ARF1_1	-4.06	-0.60987
ARF1_2	-5.13	-0.5294
ARF1_3	-3.47	-0.15535
ARF1_4	-3.97	-0.28655
ARF2_1	-0.07	-0.00653
ARF2_2	-0.09	-0.03535
ARF2_3	-0.1	0.02655
ARF2_4	-0.02	-0.02332
ARF3_1	-0.11	-0.06104
ARF3_2	-0.1	-0.00426
ARF3_3	0.03	-0.17382
ARF3_4	-0.2	-0.02685
ARF4_1	-1.28	-1.63097
ARF4_2	-1	-1.21759
ARF4_3	-1.15	-1.12029
ARF5_1	-0.15	0.05222
ARF5_2	0.03	0.05733
ARF5_3	-0.1	-0.11627
ARF5_4	-0.11	-0.05255
ARF6_1	0.51	-0.19265
ARF6_2	0.38	-0.15383
ARF6_3	0.3	-0.29834
ARF6_4	0.26	-0.08806
ARFGAP3_1	-0.43	-0.13906
ARFGAP3_2	-0.84	-0.33383
ARFGAP3_3	-0.4	-0.0307
ARHGAP1_1	-1.06	-0.51457
ARHGAP1_2	-0.92	-0.70601
ARHGAP1_3	-0.27	-0.10664
ARHGAP10_1	-0.4	0
ARHGAP10_2	-0.26	-0.0387
ARHGAP10_3	-0.4	0.03562
ARHGAP11A_1	-0.21	-0.19417
ARHGAP11A_2	-0.28	-0.21767
ARHGAP11A_3	-0.33	-0.13493
ARHGAP12_1	-0.42	-0.18442
ARHGAP12_2	-0.29	0.01416
ARHGAP12_3	-0.32	-0.17585
ARHGAP15_1	-0.6	-0.03607
ARHGAP15_2	-0.45	-0.12407
ARHGAP15_3	-0.41	-0.22948
ARHGAP17_1	-0.34	-0.23848
ARHGAP17_2	-0.42	-0.02198
ARHGAP17_3	-0.55	-0.01819
ARHGAP18_1	-0.36	-0.13916
ARHGAP18_2	-0.34	0.04485
ARHGAP18_3	-0.54	-0.13646
ARHGAP19_1	-0.53	-0.01309
ARHGAP19_2	-0.42	-0.04891
ARHGAP19_3	-0.5	-0.00969
ARHGAP21_1	-0.58	-0.36972
ARHGAP21_2	-0.42	-0.18248
ARHGAP21_3	-0.58	-0.1169
ARHGAP24_1	-0.26	-0.10541
ARHGAP24_2	-0.57	-0.08105
ARHGAP24_3	-0.53	-0.3691
ARHGAP25_1	-0.72	-0.04008
ARHGAP25_2	-0.81	-0.15962
ARHGAP25_3	-0.81	-0.04319
ARHGAP26_1	-0.49	0.04515
ARHGAP26_2	-0.45	-0.25298
ARHGAP26_3	-0.39	0.10285
ARHGAP27_1	-0.22	0.00482
ARHGAP27_2	-0.22	-0.00441
ARHGAP27_3	-0.27	0.00382
ARHGAP29_1	-0.52	0.10847
ARHGAP29_2	-0.37	-0.01106
ARHGAP29_3	-0.17	0.14354
ARHGAP30_1	-0.12	0.11279
ARHGAP30_2	-0.66	-0.36002
ARHGAP30_3	-0.55	-0.28228
ARHGAP32_1	-0.52	-0.15697
ARHGAP32_2	-0.43	-0.01403
ARHGAP32_3	-0.21	0.03926
ARHGAP4_1	-0.37	-0.06942
ARHGAP4_2	-0.42	0.10164
ARHGAP4_3	-0.38	-0.08148
ARHGAP8_1	-0.26	-0.17218
ARHGAP8_2	-0.33	-0.02159
ARHGAP8_3	-0.63	-0.05421
ARHGEF1_1	-0.18	-0.01983
ARHGEF1_2	-0.06	0.11586
ARHGEF1_3	-0.27	0.04081
ARHGEF11_1	-0.13	-0.09921
ARHGEF11_2	-0.07	-0.12466
ARHGEF11_3	-0.1	-0.15507
ARHGEF12_1	-0.19	-0.03562
ARHGEF12_2	-0.23	-0.27277
ARHGEF12_3	-0.31	-0.1004
ARHGEF18_1	-0.49	-0.41274
ARHGEF18_2	-0.3	-0.10007
ARHGEF18_3	-0.28	-0.19265
ARHGEF2_1	-0.7	-0.0305
ARHGEF2_2	-0.57	0.04142
ARHGEF2_3	-0.65	-0.19182
ARHGEF3_1	-0.5	-0.00498
ARHGEF3_2	-0.4	-0.23553
ARHGEF3_3	-0.48	-0.16243
ARID1A_1	-0.66	-0.20237
ARID1A_2	-0.21	-0.30409
ARID1A_3	-0.29	-0.33369
ARID1B_1	-0.26	-0.33383
ARID1B_3	0.02	-0.25248
ARID2_1	-0.1	0.03816
ARID2_2	-0.51	-0.40834
ARID2_3	-0.28	-0.38317
ARID3A_1	-1.41	-1.06751
ARID3A_2	-1.3	-1.11128
ARID3A_3	-1.26	-0.83132
ARID3B_1	-0.92	-0.44027
ARID3B_2	-0.49	-0.54512
ARID3B_3	-0.34	-0.1574
ARID5A_1	-0.47	-0.57477
ARID5A_2	-0.17	-0.21168
ARID5A_3	-0.3	-0.32914
ARID5B_1	0.04	-0.25903
ARID5B_2	-0.32	-0.37028
ARID5B_3	-0.27	-0.50877
ARL1_1	-2.33	-0.04053
ARL1_2	-1.2	-0.03543
ARL1_3	-0.68	-0.0863
ARL2_1	-3.97	-0.44777
ARL2_2	-3.35	-0.0287
ARL2_3	-0.42	-0.09531
ARL2BP_1	-0.29	-0.11754
ARL2BP_2	-0.3	-0.08918
ARL2BP_3	-0.53	0.07226
ARL3_1	-0.4	-0.12404
ARL3_2	-0.2	-0.06731
ARL3_3	-0.53	-0.30232
ARL5A_1	-1.8	-0.0458
ARL5A_2	-1.7	-0.18357
ARL5A_3	-1.21	-0.09287
ARL5C_1	-0.44	0.08512
ARL5C_2	-0.15	-0.16644
ARL5C_3	-0.46	-0.12797
ARL6_1	-0.46	0.04112
ARL6_2	-0.16	0.00638
ARL6_3	-0.35	-0.03847
ARL6IP1_1	-0.36	-0.1442
ARL6IP1_2	-0.71	-0.1954
ARL6IP1_3	-0.38	-0.12059
ARL6IP4_1	-0.54	-0.0689
ARL6IP4_2	-0.35	-0.11407
ARL6IP4_3	-0.44	0.09157
ARL6IP6_1	-0.42	-0.08246
ARL6IP6_2	-0.47	0.0595
ARL6IP6_3	-0.49	-0.31479
ARL8A_1	-0.31	-0.03288
ARL8A_2	-0.34	0.03528
ARL8A_3	-0.21	-0.03334
ARL8B_1	-2.01	-0.23568
ARL8B_2	-2.44	-0.1483
ARL8B_3	-2.17	-0.12374
ARMCX3	-0.27	-0.09805
ASNA1	-4.01	0.13148
ASNS_1	-0.46	-0.21616
ASNS_2	-0.46	-0.11636
ASNS_3	-0.34	0.01438
ATF3	0.04	-0.13963
ATF4_1	-0.05	-0.32591
ATF4_2	-0.07	-0.36868
ATF4_3	-0.26	-0.28951
ATF4_4	-0.57	-0.37139
ATF6_1	-0.13	-0.13898
ATF6_2	-0.09	0.11073
ATF6_3	0.13	0.01847
ATF6_4	-0.21	-0.01975
ATF6B_1	-0.1	0.03136
ATF6B_2	-0.16	-0.10923
ATF6B_3	-0.13	-0.04501
ATF6B_4	-0.12	-0.07293
AXL_1	0.31	-0.14181
AXL_2	0.17	-0.02915
AXL_3	0.28	-0.21769
BASP1_1	-2.36	-0.0051
BASP1_2	-1.05	-0.20966
BASP1_3	-1.49	-0.02647
BAZ1A_1	0.21	-0.2577
BAZ1A_2	0.24	-0.26436
BAZ1A_3	0.37	-0.21759
BAZ1B_1	-1.01	-0.08522
BAZ1B_2	0.16	-0.12749
BAZ1B_3	-0.25	-0.04481
BAZ2A_1	0.18	0.00372
BAZ2A_2	0.12	-0.10865
BAZ2A_3	0.03	-0.1047
BCAP31	-0.29	-0.04721
BCL11A_1	-0.1	-0.09311
BCL11A_2	-0.6	-0.07039
BCL11A_3	-1.14	-0.04189
BCL11B_1	-0.02	-0.30446
BCL11B_3	0.19	-0.16715
BCL7A_1	0.09	-0.13375
BCL7A_2	-0.06	-0.04754
BCL7A_3	-0.14	-0.24101
BCL7B_1	-0.2	-0.13723
BCL7B_2	-0.03	-0.21305
BCL7B_3	-0.06	-0.14821
BCL7C_1	-0.08	-0.29983
BCL7C_2	0	-0.07955
BCL7C_3	-0.28	-0.0628
BET1	-1.39	-0.14427
BFP	0.08	-0.13222
BFP	0.01	-0.01186
BFP	0.11	-0.02915
BHLHA15_1	-0.08	0.15737
BHLHA15_2	0.05	0.06035
BHLHA15_3	-0.05	0.04142
BPTF_1	-2.69	-0.30314
BPTF_2	-2.79	-0.14775
BPTF_3	-2.52	-0.20847
BRD2	0.17	-0.04204
BRD4	0.39	0.38883
BRD7_1	-0.48	-0.38434
BRD7_2	0.16	-0.08659
BRD7_3	-0.1	-0.14892
BRD9_1	-0.09	-0.25154
BRD9_2	-0.17	-0.07229
BRD9_3	0.01	-0.25132
BSG_1	0.28	-0.27798
BSG_2	0.28	-0.35364
BSG_3	0.21	0.01294
CALM1	0.57	0.52992
CALM2	0	-0.06382
CALR_1	-0.28	-0.21543
CALR_2	-0.51	-0.11806
CALR_3	-0.74	-0.21738
CANX	-1.79	-0.06878
CBX4_1	-0.08	-0.0229
CBX4_2	0.01	0.10404
CBX4_3	0.04	0.04824
CCND2	-0.97	0.27866
CDC42_1	-0.5	-0.18457
CDC42_2	-3.55	-0.2505
CDC42_3	-2.88	-0.02475
CDC6	-1.74	-0.13001
CDH17_1	0.25	-0.15472
CDH17_2	0.37	-0.29582
CDH17_3	0.29	-0.22617
CDKN2C	0.65	-0.03756
CEBPB	0.13	0.15497
CERS2_1	-0.47	-0.15574
CERS2_2	-0.38	-0.1886
CERS2_3	-0.31	0
CHD3_1	0.01	-0.0369
CHD3_2	-0.07	-0.30713
CHD3_3	-0.17	-0.15318
CHD4_1	-0.01	-0.09433
CHD4_2	-0.21	-0.21057
CHD4_3	0.14	0.13176
CHRAC1_3	0.1433	0.13
CHUK_1	-2.83	0.11144
CHUK_2	-1.14	0.0813
CHUK_3	-1.2	-0.00906
CHUK_4	-2.38	0.24657
CLEC12A_1	0.24	-0.27674
CLEC12A_2	0.18	-0.28854
CLEC12A_3	0.24	-0.29261
CLEC1B_1	0.13	-0.15409
CLEC1B_2	0.12	-0.16459
CLEC1B_3	0.32	-0.33597
CLEC4A1_1	0.3	-0.34415
CLEC4A1_2	0.35	-0.15347
CLEC4A1_3	0	-0.08489
CLEC4A2_1	0.11	-0.28681
CLEC4A2_2	0.28	-0.18214
CLEC4A2_3	0.01	-0.09081
CLEC4A3_1	0.24	-0.17177
CLEC4A3_2	0.28	-0.22723
CLEC4A3_3	0.08	0.02794
CLEC5A_1	0.3	-0.09765
CLEC5A_2	0.2	-0.05299
CLEC5A_3	0.22	-0.27674
CLEC7A_1	0.32	-0.24511
CLEC7A_2	0.2	-0.23837
CLEC7A_3	0.24	-0.34104
CLTB	-0.33	-0.04057
COPA	-4.29	0.16171
COPB1	-1.95	-0.22897
COPB2	-3.07	-0.1226
COPE	-1.52	-0.13002
COPS2_1	0.24	-0.02254
COPS2_2	-0.2	-0.03607
COPS2_3	-0.11	-0.13606
COPZ1	-4.65	-0.489
COPZ2	-0.34	-0.05175
CPM_1	0.0963071	-0.110252
CREB3_1	-0.03	-0.04383
CREB3_2	0.03	0.02492
CREB3_3	0.13	-0.04485
CREB3L2_1	-0.09	0.00483
CREB3L2_2	-0.04	-0.0177
CREB3L2_3	0.07	-0.00952
CREG1_1	0.08	-0.05153
CREG1_2	0.01	-0.02493
CREG1_3	0.02	-0.04502
Creld2	0.33	0.28655
CSF2RB_1	0.23	-0.19745
CSF2RB_2	0.14	-0.09901
CSF2RB_3	0.2	-0.10128
CXXC1_1	-1.01	-0.14882
CXXC1_2	-1.29	-0.03568
CXXC1_3	-1.05	0.00684
CXXC5_1	0.06	-0.03953
CXXC5_2	-0.17	-0.05819
CXXC5_3	-0.26	-0.00415
DAD1_1	-1.58	-0.26882
DAD1_2	-0.2	-0.19767
DAD1_3	-2.97	-0.20087
DCP2_1	-0.21	-0.17877
DCP2_2	-0.1	-0.07534
DCP2_3	-0.1	-0.03562
DDIT3_1	-0.1	0.03227
DDIT3_2	-0.01	-0.02505
DDIT3_3	-0.04	0.0024
DDOST_1	-1.37	-0.16109
DDOST_2	-2.27	-0.27554
DDOST_3	-1.36	-0.13991
DDX11_1	-1.55	-0.2962
DDX11_2	-0.15	-0.04199
DDX11_3	-0.57	-0.23217
DERL1	-0.66	-0.01994
DERL3	-0.31	-0.12725
DIRAS2_1	-0.16	-0.04172
DIRAS2_2	-0.38	-0.16109
DIRAS2_3	-0.34	-0.11899
Dis3_1	-2.32	-0.2863
Dis3_2	-3.32	-0.20091
DNAJB11_1	-0.2	-0.4361
DNAJB11_2	-0.2	-0.27388
DNAJB11_3	-0.01	0.06281
DNAJB9_1	-0.56	-0.41086
DNAJB9_2	-0.37	-0.16593
DNAJB9_3	-0.44	-0.22977
DNAJC1	-0.46	-0.07559
DNAJC3_1	-0.89	-0.25406
DNAJC3_2	-0.19	-0.32193
DNAJC3_3	-0.48	-0.19775
DOLK	-0.23	-0.06153
DOLPP1	-0.8	-0.0197
DPAGT1	-1.53	0.02141
DPF1_1	-0.14	-0.31013
DPF1_2	0.29	-0.1694
DPF1_3	-0.01	-0.16613
DPM1_1	-0.88	-0.63113
DPM1_2	-1.25	-0.6116
DPM1_3	-0.79	-0.60942
DPM3_1	-1.1	-0.64086
DPM3_2	-1.01	-0.66536
DPM3_3	-0.52	-0.60396
EDEM1_1	-0.47	-0.27114
EDEM1_2	-0.3	0.07619
EDEM1_3	-0.11	-0.32747
EDEM2	-0.69	-0.04093
EDEM3	-0.82	0.078
EGR1	0.11	-0.03109
EGR2	-3	-0.39612
EIF2A_1	0.06	-0.23584
EIF2A_2	0.02	-0.3762
EIF2A_3	0.14	-0.21347
EIF2A_4	0.09	-0.35311
EIF2AK3_1	-0.21	-0.09106
EIF2AK3_2	-0.12	0.00241
EIF2AK3_3	-0.25	-0.08583
EIF2AK3_4	-0.11	0.04368
ELK4_1	-0.09	-0.20966
ELK4_2	0.11	-0.02647
ELK4_3	0	-0.23869
ENPP1_1	0.27	-0.21786
ENPP1_2	0.22	-0.20936
ENPP1_3	0.24	-0.12189
ENPP6_1	0.11	-0.18057
ENPP6_2	0.16	-0.16952
ENPP6_3	0.15	-0.20588
ENTPD1_1	0.16	-0.05907
ENTPD1_2	0.23	0.02693
ENTPD1_3	0.16	-0.06073
ERLEC1	-0.36	-0.0727
ERN1_1	-0.79	-0.9789
ERN1_2	-1.13	-1.38961
ERN1_3	-0.83	-0.92064
ERN1_4	-0.58	-1.06851
ERN2_1	-0.09	-0.02758
ERN2_2	-0.04	0.06051
ERN2_3	-0.02	0.06582
ERN2_4	-0.08	0.00663
ERO1LB	-0.35	-0.03935
EVC2_1	0.22	-0.13691
EVC2_2	0.13	-0.31284
EVC2_3	0.34	-0.3055
EVI2A_1	0.24	-0.0992
EVI2A_2	0.08	-0.08954
EVI2A_3	-0.05	-0.14143
EXOC6B	-0.41	-0.05041
FAM46C	0.32	-0.25831
FANCL_1	-1	-0.1633
FANCL_2	-1.72	-0.1348
FANCL_3	0.26	-0.20425
Fas	0.36	0.03053
FBXW7_1	0.34	0.04824
FBXW7_2	0.53	-0.04383
FBXW7_3	0.48	0.11565
FCGRT_1	0.3	-0.20457
FCGRT_2	0.19	-0.0387
FCGRT_3	0.16	-0.30095
FGD2_1	-0.37	0.25819
FGD2_2	-0.42	0.05658
FGD2_3	-0.29	-0.27753
FGD6_1	-0.44	-0.16481
FGD6_2	-0.3	0.0868
FGD6_3	-0.45	-0.17284
FKBP14_1	-0.17	-0.12867
FKBP14_2	-0.42	-0.19943
FKBP14_3	-0.16	-0.16011
FLI1	0.34	0.3404
FOS	0.23	-0.13916
FOSB	-0.92	-0.3385
FUS_1	-0.28	0.0546
FUS_2	-0.23	0.04244
FUS_3	-0.38	0.00641
FUT8	-0.49	-0.3463
G2E3_1	-0.3	-0.0051
G2E3_2	-0.03	-0.20966
G2E3_3	-0.64	-0.02647
GALNT13	-0.34	-0.0892
GALNT6	-0.22	-0.13058
GANAB	-1.43	0.15991
GATAD2A_1	-0.21	-0.23229
GATAD2A_2	0.05	-0.37225
GATAD2A_3	-0.16	-0.16659
GATAD2B_1	-0.09	-0.24968
GATAD2B_2	-0.18	-0.00532
GBF1	-4.21	-0.12148
GFPT1_1	-1.58	-0.25139
GFPT1_2	-3.75	-0.47189
GFPT1_3	-1.32	-0.43151
GLIPR1_1	-0.01	-0.02076
GLIPR1_2	0.02	-0.01712
GLIPR1_3	0.02	0.0476
GOSR1	-0.96	-0.22075
GOSR2_1	-2.16	-0.11864
GOSR2_2	-2.93	-0.25741
GOSR2_3	-0.51	-0.20062
GPAA1	-0.24	-0.04024
GPM6A_2	0.24	-0.16257
GPM6A_3	0.12	-0.0887
GPR137B_1	0.22	-0.21324
GPR137B_2	0.19	-0.04941
GPR137B_3	0.19	-0.01892
GPR155_1	0.16	-0.19704
GPR155_2	0.24	-0.26187
GPR155_3	0.32	-0.24101
GPR18_1	0.12	-0.10869
GPR18_2	0.16	-0.06602
GPR18_3	0.23	-0.08708
GPR55_1	0.14	-0.23472
GPR55_2	0.07	-0.06371
GPR55_3	0.12	-0.16194
GRAP_1	-0.08	-0.16649
GRAP_2	0.04	0.03607
GRAP_3	-0.15	-0.12463
GSK3A_1	0	-0.03624
GSK3A_2	-0.23	0.07272
GSK3A_3	0.42	-0.0109
HBP1_1	0.1	-0.29323
HBP1_2	0.09	-0.1378
HBP1_3	-0.06	-0.30314
HDAC1_1	-0.28	-1.04148
HDAC1_2	0.12	-0.74566
HDAC1_3	-0.28	-1.20128
HDAC2_1	-0.06	-0.21901
HDAC2_2	-0.11	-0.20696
HDAC2_3	-0.03	-0.26303
HDAC7_1	-0.05	-0.02093
HDAC7_2	-0.38	-0.03586
HDAC7_3	-0.28	-0.20091
HEPACAM2_1	-0.07	-0.20123
HEPACAM2_2	0.14	-0.12768
HEPACAM2_3	0.17	-0.06353
HERPUD1_1	0.56	-0.15517
HERPUD1_2	-0.21	0.164
HERPUD1_3	-0.58	-0.1455
HID1_1	-0.03	-0.31002
HID1_2	-0.09	-0.35188
HID1_3	0.08	-0.17688
HSBP1_1	0.13	-0.05677
HSBP1_2	-0.09	-0.05007
HSBP1_3	0.03	-0.00699
Hsp90b1	-1.18	-0.67736
HSPA13	-0.68	-0.22936
HSPA5_1	-2.82	0.04278
HSPA5_2	-0.92	-0.18941
HSPA5_3	-2.28	-0.32193
HSPA5_4	-1.28	0.00773
HYOU1_1	-2.43	-0.55002
HYOU1_2	-2.64	-0.27231
HYOU1_3	-2.53	-0.01819
IFT22_1	-0.32	0.19794
IFT22_2	-0.3	-0.03284
IFT22_3	-0.33	-0.1585
IGSF6_1	0.09	-0.0842
IGSF6_2	0.24	-0.06383
IGSF6_3	0.29	-0.27371
IKBKB_1	-3.26	-0.09906
IKBKB_2	-1.77	0.02327
IKBKB_3	-2.47	0.09096
IKBKB_4	-3.47	0.16121
IKBKG_1	0.1	-0.05501
IKBKG_2	-3.08	0.04149
IKBKG_3	-2.47	-0.09445
IKBKG_4	-0.39	-0.00985
IL13RA1_1	0.26	-0.0592
IL13RA1_2	0.27	-0.19569
IL13RA1_3	0.14	-0.07689
IMPDH1	-0.41	-0.02359
INO80_1	-0.25	-0.16672
INO80_2	-0.21	-0.45251
INO80_3	-1.02	-0.01924
INO80B_1	-0.7	-0.28504
INO80B_2	-0.16	-0.3061
INO80B_3	-0.05	-0.24685
INO80C_1	-0.7	-0.11333
INO80C_2	0.11	-0.22239
INO80C_3	0.07	-0.06237
INO80D_1	-0.02	-0.1099
INO80D_2	0.08	0.00613
INO80D_3	0.17	-0.09686
INO80E_1	-0.25	-0.10801
INO80E_2	-0.02	-0.03491
INO80E_3	0.17	-0.25672
IRAK1	0.08	0.26068
IRAK2	0.09	0.30895
IRF1	0.24	0.31073
IRF2	0.02	0.24738
IRF2BP2_1	-0.07	-0.06758
IRF2BP2_2	-1.06	-0.11834
IRF2BP2_3	-1.43	0.04208
IRF3	-0.03	0.3896
IRF4_1	-1.53	-1.07907
IRF4_2	-1.96	-2.13938
IRF4_3	-1.99	-1.64543
ISG20_1	-0.05	-0.08601
ISG20_2	0	0.02056
ISG20_3	-0.04	0.00693
ITSN1_1	-0.55	-0.19265
ITSN1_2	-0.44	-0.12553
ITSN1_3	-0.29	0.08634
ITSN2_1	-0.45	0.11548
ITSN2_2	-0.43	0.25987
ITSN2_3	-0.78	0.00699
JUN_1	-0.03	-0.10391
JUN_2	-0.23	-0.152
JUN_3	-0.05	0.02495
JUN_4	-0.07	-0.21675
JUNB	-0.94	-0.73791
Jund	-0.17	0.15231
KDELR3_1	-0.43	-0.08471
KDELR3_2	-0.26	-0.08196
KDELR3_3	-0.04	-0.087
KHSRP_1	-0.35	-0.13147
KHSRP_2	-0.74	0.23261
KHSRP_3	0.08	-0.03307
KLF2	0.09	-0.05889
KLF4	0.41	0.41123
KLF6	0.64	0.97001
KRAS_1	-0.42	-0.19704
KRAS_2	-0.42	-0.31694
KRAS_3	-0.56	-0.27959
LCORL_1	0.1	-0.31566
LCORL_2	0.01	-0.18997
LCORL_3	-0.08	0.02857
LMAN1	-0.34	-0.17982
LMAN2	-0.37	-0.1188
LMNA_1	-0.42	-0.21539
LMNA_2	-0.33	-0.42599
LMNA_3	0	-0.1425
LRP1_1	0.16	-0.10875
LRP1_2	0.22	-0.20849
LRP1_3	0.14	-0.07195
LRRN3_1	0.21	-0.34792
LRRN3_2	0.17	-0.11847
LRRN3_3	0.3	-0.14781
LY6C1_1	0.12	-0.33334
LY6C1_2	0.14	-0.20198
LY6C1_3	0.16	0.01762
LY6C2_1	0.14	-0.09082
LY6C2_2	0.02	-0.26857
LY6C2_3	0.12	-0.16096
LY6D_1	0.16	-0.28369
LY6D_2	0.22	-0.23974
LY6D_3	0.2	-0.2944
LY6K_1	0.24	-0.27839
LY6K_2	0.19	-0.04995
LY6K_3	0.13	-0.2291
MAFF	-0.64	-0.00978
MAGT1_1	-0.18	-0.2106
MAGT1_2	0	-0.25407
MAGT1_3	-0.06	-0.3224
MAN1B1	-0.29	-0.21646
MAN1C1	-0.33	-0.15673
MAP2K1_1	-0.2	0.06451
MAP2K1_2	0.06	0.05736
MAP2K1_3	-0.08	0.10277
MAP2K1_4	0.14	0.00884
MAP2K2_1	0.21	0.03466
MAP2K2_2	-0.14	0.12004
MAP2K2_3	-0.02	-0.03732
MAP2K2_4	0.15	-0.09369
MAP2K3_1	-0.23	-0.06975
MAP2K3_2	0.14	0.03842
MAP2K3_3	0.17	-0.00448
MAP2K3_4	0.21	0.02509
MAP2K4_1	0.09	0.09374
MAP2K4_2	0.04	0.07145
MAP2K4_3	0.2	0.13006
MAP2K4_4	0.16	0.12609
MAP2K6_1	0.06	-0.10402
MAP2K6_2	0	0.10897
MAP2K6_3	0.01	0.0351
MAP2K6_4	0.12	0.12514
MAP2K7_1	-0.07	0.2997
MAP2K7_2	-0.3	0.02066
MAP2K7_3	0.07	0.1152
MAP2K7_4	0.27	0.04142
MAP3K1_1	0	0.08671
MAP3K1_2	0.25	0.2426
MAP3K1_3	0.16	0.09656
MAP3K1_4	-0.08	0.10317
MAP3K14_1	-0.84	0.0517
MAP3K14_2	-0.16	0.17546
MAP3K14_3	-1.56	0.06483
MAP3K14_4	-1.98	0.0555
MAP3K3_1	0.06	0.13732
MAP3K3_2	0.1	0.12663
MAP3K3_3	0.16	0.15708
MAP3K3_4	0.07	0.07822
MAP3K4_1	0.16	0.03964
MAP3K4_2	0.21	-0.05889
MAP3K4_3	0.09	0.05454
MAP3K4_4	0.11	0.09214
MAP3K5_1	0.07	-0.24668
MAP3K5_2	0.04	-0.23634
MAP3K5_3	0.1	-0.09793
MAP3K5_4	-0.04	-0.21771
MAP3K7_1	-0.66	-0.05189
MAP3K7_2	-1.01	0.10404
MAP3K7_3	0.04	0.09552
MAP3K7_4	-2.1	-0.099
MAPK1_1	-0.17	-0.06736
MAPK1_2	-0.05	-0.28847
MAPK1_3	0	-0.28314
MAPK1_4	-0.03	-0.29478
MAPK11_1	-0.01	-0.03506
MAPK11_2	0.22	0.1431
MAPK11_3	-0.04	0.09119
MAPK11_4	0.05	0.07899
MAPK14_1	-0.06	-1.16935
MAPK14_2	0.09	-1.06209
MAPK14_3	0.1	-1.23433
MAPK14_4	0.15	-1.2215
MAPK3_1	0.03	-0.17152
MAPK3_2	0.12	0.04276
MAPK3_3	0.07	0.1153
MAPK3_4	-0.01	0.05776
MAPK8_1	-0.06	-0.06413
MAPK8_2	0.01	0.06628
MAPK8_3	0.19	-0.07757
MAPK8_4	0	-0.03293
MAPK9_1	0.13	0.05333
MAPK9_2	0.16	-0.00934
MAPK9_3	0.04	0.13397
MAPK9_4	-0.22	-0.04758
MBD1_1	-0.03	-0.14775
MBD1_2	-0.04	-0.20847
MBD1_3	-0.05	-0.1633
MBD2_1	-0.52	-0.65644
MBD2_2	-0.53	-0.68093
MBD2_3	-0.45	-0.31194
MBD3_1	0.02	-0.35364
MBD3_2	-0.21	-0.19265
MBD3_3	0.1	-0.19855
MBNL2_1	-0.01	-0.0389
MBNL2_2	-0.25	-0.11857
MBNL2_3	0.02	-0.2043
MBTPS1_1	-2.61	-0.08746
MBTPS1_2	-0.95	-0.18147
MBTPS1_3	-3.1	-0.17373
MBTPS1_4	-1.96	-0.26079
MBTPS2_1	-2.42	-0.19232
MBTPS2_2	-3.89	0.08442
MBTPS2_3	-3.21	-0.15826
MBTPS2_4	-3.55	-0.04064
MCL1	0.01	0.14975
MCRS1_1	-1.64	-0.20454
MCRS1_2	-0.18	-0.21689
MCRS1_3	-3.06	-0.1635
MEF2A_1	0.09	-0.26255
MEF2A_2	-0.12	-0.1278
MEF2A_3	0.11	-0.0051
MEF2C	-0.89	-0.20811
MGAT1	-0.51	-0.12948
MGAT2	-0.74	-0.21299
MGAT3	-0.42	-0.02956
MGAT4B	-0.17	0.01383
MORF4L2	-0.21	-0.12344
MS4A4C_2	0.1	-0.05462
MS4A4C_3	0.07	-0.29329
MTA1_1	-0.25	-0.31501
MTA1_2	-0.1	-0.38842
MTA1_3	-0.09	-0.1985
MTA2_1	-0.15	-0.32789
MTA2_2	-0.4	-0.87309
MTA2_3	-0.17	-0.53281
MTA3_1	-0.29	-0.18442
MTA3_2	-0.06	-0.21592
MTA3_3	-0.32	-0.21092
Myb	0.11	0.15073
MYC_1	-2.61	-1.43063
MYC_2	-2.01	-1.70992
MYC_3	-2.97	-2.66985
MYDGF_1	-0.16	-0.35042
MYDGF_2	-0.33	-0.21573
MYDGF_3	-0.33	-0.19411
Mzb1	-0.23	-0.08547
NACC2_1	-0.03	-0.12749
NACC2_2	-0.08	-0.04481
NACC2_3	0.16	-0.13006
NAPA_2	-2.68	-0.0801
NCOA2_1	0.17	-0.1348
NCOA2_2	0.19	-0.20425
NCOA2_3	0.18	-0.2577
NFKB1_1	-0.74	0.10953
NFKB1_2	-1.21	0.01511
NFKB1_3	-0.05	-0.05022
NFKB1_4	-0.51	0.04059
NFKB2_1	-0.54	0.06615
NFKB2_2	-0.28	0.14146
NFKB2_3	-0.44	0.09197
NFKB2_4	-0.76	0.08193
NFKBIA_1	0.33	-1.27652
NFKBIA_2	0.63	-1.29691
NFKBIA_3	0.44	-1.22344
NFKBIA_4	0.32	-1.24931
NFRKB_1	-0.17	-0.1917
NFRKB_2	0.04	0.03726
NFRKB_3	-0.09	-0.43507
NFXL1_1	0.16	-0.26436
NFXL1_2	0.1	-0.21759
NFXL1_3	0.14	-0.08522
NGLY1	-0.24	-0.14192
NPLOC4	-1.58	0.04505
NR4A1_1	0.08	-0.03723
NR4A1_2	0.11	-0.0949
NR4A1_3	-0.02	-0.0229
NRAS_1	-0.79	0.02753
NRAS_2	-0.42	-0.05772
NRAS_3	-0.55	-0.15791
OS9	-0.8	-0.03235
OST4_1	-0.72	-1.24101
OST4_2	-2.18	-0.58318
OST4_3	-0.68	-0.35845
OSTC_1	-0.11	-0.47393
OSTC_2	-0.43	-0.56027
OSTC_3	-0.18	-0.48543
P4HB	-0.39	-0.06857
PARK2	-0.31	0.03536
PBRM1_1	-0.17	-0.23851
PBRM1_2	-0.1	-0.04272
PBRM1_3	-0.74	-0.2612
PDCD5	-0.87	0.0461
PDIA6_1	-0.68	-0.5042
PDIA6_2	-0.3	-0.19811
PDIA6_3	-0.3	-0.70316
PGAP1_2	0.24	-0.02915
PGAP1_3	0.14	-0.17816
PHF10_1	-0.38	-0.12209
PHF10_2	-0.07	-0.14975
PHF10_3	-0.47	-0.08466
PHF19_1	-1.9	-0.23869
PHF19_2	-2.46	-0.29323
PHF19_3	-0.63	-0.1378
Phf6_1	0.41	-0.30314
Phf6_2	0.33	-0.14775
Phf6_3	0.64	-0.20847
PIGB	-0.17	-0.09954
PIGF	-0.21	-0.13415
PIGG	-0.12	-0.14079
PIGK	-0.16	-0.19033
PIGM	-0.16	-0.19827
PIGT	-0.29	-0.02874
PIGZ	-0.48	-0.01731
PIK3CD	-0.36	-0.13606
PIK3R1	-1.34	-0.53097
PIM1	0.1	-0.11548
PIM2	-0.45	-0.93523
PLAG1_1	-0.29	-0.1047
PLAG1_2	-0.29	-0.26255
PLAG1_3	-0.11	-0.1278
PLEKHG2_1	-0.36	-0.03747
PLEKHG2_2	-0.32	-0.19076
PLEKHG2_3	-0.31	0.07613
PLXNC1_2	-0.04	-0.04883
PLXNC1_3	0.05	-0.22098
POLE3_1	-0.3	-0.11578
POLE3_2	-0.42	-0.06592
POLE3_3	-0.42	-0.02373
Pomp	-1.15	-0.28688
POMT2	-0.3	0.09742
POU2AF1_1	-1.89	-1.0902
POU2AF1_2	-1.89	-1.41335
POU2AF1_3	-1.83	-1.47117
POU6F1	-0.15	0
PPP2R5B_1	-0.19	-0.36895
PPP2R5B_2	-0.76	-0.17486
PPP2R5B_3	-0.27	-0.03756
Prdm1_1	-0.96	-2.98089
Prdm1_2	-0.79	-2.45036
Prdm1_3	-0.69	-3.19944
Prdx1	0.23	-0.06764
PRDX2	-0.12	-0.02186
PRDX3	0.53	-0.04087
PRDX4	0.14	0.08209
PREB	-1.75	-0.60768
PRKCD	0.21	0.02857
PRKD2	-0.19	0.65208
PSIP1_1	-0.1	-0.23869
PSIP1_2	0.15	-0.29323
PSIP1_3	-0.52	-0.1378
PSMA1	-0.16	-0.05349
PSMA2	-3.44	-0.16484
PSMA3	-0.41	-0.16812
PSMA4	-4.73	-0.46472
PSMA5	-4.11	-0.43461
PSMA7	-2.45	-0.23217
PSMB1	-2.18	-0.19003
PSMB11	-0.33	-0.14034
PSMB2	-4.05	0.02995
PSMB4	-3.95	0.01633
PSMB5	-0.47	-0.11834
PSMB6	-4.22	-0.09954
PSMB7	-0.19	-0.07708
PSMB8	-0.21	-0.11811
PSMB9	-0.45	0.01781
PXDC1_2	-0.02	-0.01433
PXDC1_3	0.17	-0.06241
RAB1	-0.28	-0.19989
RAB14_1	-2.54	0.08848
RAB14_2	-1.87	0.09464
RAB14_3	-0.48	0.09104
RAB18_1	-0.29	0.13327
RAB18_2	-0.4	0.11026
RAB18_3	-0.51	0.3861
RAB19_1	-0.28	-0.15687
RAB19_2	-0.69	-0.14771
RAB19_3	-0.41	0.05027
RAB1A_1	-2.35	0
RAB1A_2	-0.64	-0.07088
RAB1A_3	-0.6	-0.14539
RAB21_1	-0.29	-0.05063
RAB21_2	-1.21	-0.04275
RAB21_3	-1.44	-0.01266
RAB26_1	-0.6	-0.00322
RAB26_2	-0.37	-0.12881
RAB26_3	-0.66	-0.1753
RAB28_1	-0.08	-0.05045
RAB28_2	-0.09	-0.16294
RAB28_3	-0.31	-0.01781
RAB2A_1	-1.41	-0.22388
RAB2A_2	-0.9	-0.22385
RAB2A_3	-0.36	-0.12192
RAB2B_1	-0.5	-0.06002
RAB2B_2	-0.24	0.02831
RAB2B_3	-0.38	-0.00415
RAB30_1	-0.11	0.05116
RAB30_2	-0.12	0.01516
RAB30_3	-0.36	-0.10771
RAB33B_1	-0.35	-0.08729
RAB33B_2	-0.55	-0.19388
RAB33B_3	-0.34	-0.19438
RAB35_1	-2.52	0.05816
RAB35_2	-3.8	0.00877
RAB35_3	-3.58	0.07522
RAB37_1	-0.38	-0.27
RAB37_2	-0.38	-0.10434
RAB37_3	-0.58	-0.10128
RAB39_1	-0.28	-0.02067
RAB39_2	-1.12	-0.09994
RAB39_3	-0.21	0.12299
RAB39B_1	-0.28	-0.12752
RAB39B_2	-0.28	0.05457
RAB39B_3	-0.33	-0.09613
RAB3A_1	-0.34	-0.13543
RAB3A_2	-0.33	-0.01
RAB3A_3	-0.29	-0.03262
RAB3B_1	-0.38	-0.02801
RAB3B_2	-0.27	-0.15287
RAB3B_3	-0.34	-0.06532
RAB3D_1	-0.31	-0.08261
RAB3D_2	-0.29	-0.08278
RAB3D_3	-0.32	-0.04659
RAB3GAP1_1	-0.65	-0.2713
RAB3GAP1_2	-0.56	-0.10607
RAB3GAP1_3	-0.71	-0.20678
RAB3GAP2_1	-0.53	-0.07064
RAB3GAP2_2	-0.46	-0.19994
RAB3GAP2_3	-0.66	0.14762
RAB3IP_1	-0.38	0.03731
RAB3IP_2	-0.22	-0.05247
RAB3IP_3	-0.36	0.20043
RAB40B_1	-0.55	-0.1054
RAB40B_2	-0.45	-0.03589
RAB40B_3	-0.37	-0.00331
RAB43_1	-0.26	-0.12063
RAB43_2	-0.26	-0.0458
RAB43_3	-0.19	0.00684
RAB4A_1	-0.24	0.11946
RAB4A_2	-0.12	0.13473
RAB4A_3	-0.25	-0.07769
RAB4B_1	-0.25	-0.30339
RAB4B_2	-0.42	-0.00552
RAB4B_3	-0.24	-0.0651
RAB5B_1	-0.5	-0.1696
RAB5B_2	-0.51	0.07243
RAB5B_3	-0.31	0.04333
RAB6A_1	-0.4	-0.14389
RAB6A_2	-3.05	-0.19551
RAB6A_3	-2.93	-0.15101
RAB6B_1	-0.27	-0.1831
RAB6B_2	-0.32	-0.16373
RAB6B_3	-0.42	-0.06756
RAB7_1	-3.6	0.12657
RAB7_2	-0.15	-0.08944
RAB7_3	-2.33	-0.2881
RAB8A_1	-0.19	-0.05938
RAB8A_2	-0.64	-0.15521
RAB8A_3	-0.31	-0.03097
RAB8B	-0.62	-0.10486
RABAC1	-0.04	-0.02076
RABEP2_1	-0.55	0.02083
RABEP2_2	-0.19	-0.28787
RABEP2_3	-0.24	0.00537
RABGAP1_1	-0.63	0.04008
RABGAP1_2	-0.35	0.02924
RABGAP1_3	-0.05	0.17786
RABGAP1L_1	-0.19	-0.05043
RABGAP1L_2	0	-0.25376
RABGAP1L_3	-0.2	-0.16636
RABIF_1	-0.6	-0.08944
RABIF_2	-2.96	-0.11207
RABIF_3	-1.66	0.40582
RABL2_1	-0.19	-0.06619
RABL2_2	-0.28	-0.03539
RABL2_3	-0.35	-0.14914
RABL3_1	-0.59	0.08795
RABL3_2	-1.32	-0.20645
RABL3_3	-0.38	0.29919
RAC1_1	-0.52	-0.24699
RAC1_2	-0.93	-0.32284
RAC1_3	-0.58	-0.55879
RAC2_1	-0.57	-0.11173
RAC2_2	-0.74	-0.29363
RAC2_3	-0.47	-0.18145
RALA_1	-0.82	0.06514
RALA_2	-0.97	-0.17173
RALA_3	-0.69	-0.16749
RALGDS_1	-0.29	-0.17342
RALGDS_2	-0.68	-0.1767
RALGDS_3	-0.59	-0.1564
RALGPS2_1	-0.46	-0.10016
RALGPS2_2	-0.67	-0.08588
RALGPS2_3	-0.64	-0.28414
RAN_1	-3.39	-0.17374
RAN_2	-2.16	0.00895
RAN_3	-1.65	-0.13148
RAP1A_1	-0.42	-0.20421
RAP1A_2	-0.55	-0.22164
RAP1A_3	-0.37	-0.01475
RAP1B_1	-0.34	0.01716
RAP1B_2	-0.46	-0.26127
RAP1B_3	-0.15	-0.14424
RAP2B_1	-0.29	-0.11939
RAP2B_2	-0.36	0.02769
RAP2B_3	-0.32	-0.18709
RAPGEF5_1	-0.11	0.18001
RAPGEF5_2	-0.46	-0.11944
RAPGEF5_3	-0.38	-0.17171
RASL10A_1	-0.43	-0.16106
RASL10A_2	-0.39	-0.15934
RASL10A_3	-0.56	-0.05199
RBBP4_1	-1.89	-0.57619
RBBP4_2	-1.56	-0.4357
RBBP4_3	-1.12	-0.39707
RBBP7_1	-0.32	-0.1745
RBBP7_2	-0.84	-0.11754
RBBP7_3	-0.43	-0.12553
REL_1	-4.45	0.15747
REL_2	-1.02	0.0063
REL_3	-3.97	0.14486
REL_4	-0.06	-0.01135
RELA_1	-0.35	-0.11165
RELA_2	-0.03	0.06982
RELA_3	-1.32	-0.01785
RELA_4	-1.18	0.08712
RELB_1	-0.22	0.04612
RELB_2	0.18	0.12484
RELB_3	0.08	0.00986
RELB_4	-0.18	-0.00812
REM2_1	-0.01	-0.00263
REM2_2	-0.37	-0.0978
REM2_3	-0.21	-0.04939
RFT1	-3.7	0.08761
RHBDF2_1	0.12	-0.01493
RHBDF2_2	0.14	-0.09066
RHBDF2_3	0.16	-0.09664
RHEB_1	-0.68	-0.11264
RHEB_2	-0.63	0.01291
RHEB_3	-1.63	-0.30977
RHOA_1	-0.39	-0.07684
RHOA_2	-0.31	-0.36257
RHOA_3	-0.47	0.04172
Rhob	-0.12	0.38628
RHOBTB1_1	-0.44	-0.11641
RHOBTB1_2	-0.39	0
RHOBTB1_3	-0.55	-0.09806
RHOF_1	-0.23	-0.16439
RHOF_2	-0.23	-0.08246
RHOF_3	-0.29	-0.07039
RHOG_1	-0.38	-0.26647
RHOG_2	-0.66	-0.11899
RHOG_3	-0.69	-0.30685
RHOH_1	-1.9	-0.12666
RHOH_2	-1.34	0.00285
RHOH_3	-1.73	0.13642
RHOQ_1	-0.43	-0.06631
RHOQ_2	-0.32	-0.05996
RHOQ_3	-0.4	-0.1689
RHPN2	-0.35	0.01919
RIT2_1	-0.32	-0.17958
RIT2_2	-0.28	-0.09181
RIT2_3	-0.18	-0.04431
RNF5	-0.33	-0.13722
Rosa26	-0.02	-0.02669
Rosa26	0.08	-0.1047
Rosa26	0	-0.02661
RPN1_1	-1.48	-0.18499
RPN1_2	-2.93	-0.16812
RPN1_3	-4.38	-0.17476
RPN2_1	-1.11	-0.23447
RPN2_2	-2.17	-0.25293
RPN2_3	-2.14	-0.24936
RPS6KA4_1	0.07	-0.01957
RPS6KA4_2	0.08	0.17866
RPS6KA4_3	-0.02	0.15263
RPS6KA4_4	-0.01	0.0705
RRAD_1	-0.41	-0.07126
RRAD_2	-0.28	-0.09866
RRAD_3	-0.45	-0.16542
RRAS2_1	-1.6	-0.21233
RRAS2_2	-1.4	-0.22356
RRAS2_3	-1.5	-0.1471
RRBP1	-0.58	-0.11577
RUVBL1_1	-3.06	-0.43652
RUVBL1_2	-3.32	-0.55578
RUVBL1_3	-0.14	-0.21192
RUVBL2_1	-1.47	-0.3168
RUVBL2_2	-2.32	-0.39968
RUVBL2_3	-4.64	0.12973
S100a8	-0.64	0.05407
S100a9	0.07	-0.13842
SAR1A_1	0.03	-0.06654
SAR1A_2	0.04	-0.07466
SAR1A_3	-0.08	-0.01877
SAR1A_4	-0.13	0.01948
SAR1B_1	-0.03	-0.05344
SAR1B_2	0.01	-0.05603
SAR1B_3	0.05	0.01908
SAR1B_4	-0.1	-0.04439
SCD1_1	0.03	-0.32062
SCD1_2	-0.07	-0.18818
SCD1_3	0.07	-0.36548
SEC11A	-0.54	-0.1579
SEC11C	-0.42	-0.18215
SEC13	-0.25	-0.01684
SEC16A	-1.27	-0.14658
SEC22B	-0.9	-0.37557
SEC23A	-0.38	-0.10309
SEC24A	-0.28	0.00791
SEC31A_1	-2.43	-0.31701
SEC31A_2	-0.64	-0.45854
SEC31A_3	-4.17	-0.42421
SEC61A1_1	-2.1	-0.45403
SEC61A1_2	-2.89	-0.40109
SEC61A1_3	-1.74	-0.70664
SEC61B_1	-1.01	-0.15056
SEC61B_2	-0.14	-0.25667
SEC61B_3	-1.59	-0.1003
SEC61G	-1.71	-0.1626
SEC62	-1.63	-0.21552
SEC63	-1.8	-0.44846
SEL1L	-3.04	-0.30117
SEMA7A_1	0.03	-0.11321
SEMA7A_2	0	-0.11165
SEMA7A_3	0.03	-0.19562
SERP1_1	-0.31	-0.05316
SERP1_2	-0.28	-0.07141
SERP1_3	-0.05	-0.10482
SIL1	-0.3	0.05041
SLAMF7_1	0.21	-0.173
SLAMF7_2	0.3	-0.19804
SLAMF7_3	0.3	-0.04815
SLAMF9_1	0.27	-0.14037
SLAMF9_2	0.18	-0.21594
SLAMF9_3	0.29	-0.2647
SLC41A1_1	0.2	-0.09878
SLC41A1_2	0.19	-0.1242
SLC41A1_3	0.28	-0.00932
SMARCA1_1	-0.15	-0.24917
SMARCA1_2	-0.06	-0.1776
SMARCA1_3	-0.18	-0.27768
SMARCA2_1	-0.04	0.05987
SMARCA2_2	-0.27	-0.3534
SMARCA2_3	-0.14	-0.18581
SMARCA4_1	-2.4	-0.68461
SMARCA4_2	-3.47	0.21664
SMARCA4_3	-4.32	-0.72408
SMARCA5_1	-0.84	0.0246
SMARCA5_2	-1.22	-0.1437
SMARCA5_3	-0.69	-0.24852
SMARCB1_1	-2.12	-0.46632
SMARCB1_2	-2.25	-0.68499
SMARCB1_3	-1.25	-0.53352
SMARCC1_1	-1.56	-0.75226
SMARCC1_2	-1.43	-0.36938
SMARCC1_3	-0.2	-0.23372
SMARCC2_1	-0.4	-0.2092
SMARCC2_2	-0.1	-0.20163
SMARCC2_3	-0.32	-0.21649
SMARCD1_1	-0.18	-0.25363
SMARCD1_2	-0.12	-0.25172
SMARCD1_3	0.08	-0.21751
SMARCD2_1	-0.09	-0.19931
SMARCD2_2	-0.94	-0.45653
SMARCD2_3	-0.89	-0.47007
SMARCD3_1	-0.3	-0.33842
SMARCD3_2	-0.04	-0.19696
SMARCD3_3	-0.09	-0.0537
SMARCE1_1	-1	-0.32766
SMARCE1_2	-1.06	-0.2485
SMARCE1_3	-1.29	-0.07006
SORL1_1	0.23	-0.03598
SORL1_2	0.24	-0.19788
SORL1_3	0.19	-0.13114
Sox4	-0.19	-0.38316
SP140_1	-0.53	-0.23869
SP140_2	-0.37	-0.29323
SP140_3	-0.45	-0.1378
SP3_1	0.12	-0.78218
SP3_2	0.01	-0.86673
SP3_3	0.19	-0.75717
SPCS1	-0.46	-0.11154
SPCS2	-1.91	-0.3191
SPCS3_1	0.01	-0.40926
SPCS3_2	-1.12	-0.4724
SPCS3_3	-0.72	-0.58877
SPTY2D1	-0.42	-0.13257
SRP14	-2.02	-0.11417
SRP19	-0.45	-0.0726
SRP68	-1.36	0.00309
SRP72	-1.09	-0.46566
SRPR_1	-0.85	-0.37037
SRPR_2	-0.9	-0.16506
SRPR_3	-1.39	-0.08662
SRPRB_1	-1.25	-0.1666
SRPRB_2	-1.6	-0.34769
SRPRB_3	-1.63	-0.25873
SS18_1	-0.23	-0.31326
SS18_2	-0.09	-0.31421
SS18_3	-0.23	-0.24874
SSR1_1	-0.42	-0.35002
SSR1_2	-1.89	-0.34351
SSR1_3	-0.72	-0.31928
SSR2	-1.17	-0.14893
SSR3	-0.21	-0.01866
SSR4	-0.42	-0.0484
STAT1_1	-0.14	-0.19876
STAT1_2	-0.07	0.06095
STAT1_3	0.07	0.12135
STAT1_4	-0.02	0.06951
STAT3_1	-1.06	-0.6676
STAT3_2	-0.58	-0.19178
STAT3_3	-1.12	-0.62149
STAT3_4	-0.33	-0.60391
STAT5B	-0.23	0.00968
STT3A_1	-0.33	-0.62196
STT3A_2	-0.15	-0.56221
STT3A_3	-0.25	-0.5325
STT3B_1	-1.06	-0.2478
STT3B_2	-1	-0.27948
STT3B_3	-1.1	-0.27363
STX11	-0.2	-0.01045
STX12	-0.56	0.00269
STX18	-1.71	-0.11357
SYVN1_1	-2.72	-0.01707
SYVN1_2	-2.62	-0.09115
SYVN1_3	-3.2	-0.21649
TACSTD2_2	0.17	-0.06364
TACSTD2_3	0.16	-0.10572
TAF10_1	-1.25	-0.1375
TAF10_2	-1.15	-0.08221
TAF10_3	-0.18	-0.13058
TAOK1_1	0.13	0.14627
TAOK1_2	0.02	0.14627
TAOK1_3	0.01	0.02963
TAOK1_4	0.09	-0.05216
TAOK3_1	-0.42	-0.32985
TAOK3_2	-0.11	-0.27272
TAOK3_3	-0.45	-0.56805
TAOK3_4	-0.12	-0.61787
Tcf19_1	-0.66	-0.1633
Tcf19_2	-0.38	-0.1348
Tcf19_3	-1.49	-0.20425
TCF3_1	-0.6	-0.92256
TCF3_2	0.01	-0.74797
TCF3_3	0.1	-0.36662
TCF4	-0.91	-0.3889
Tcl1b3	0.13	0.0185
TFDP2_1	0.48	-0.0051
TFDP2_2	-0.15	-0.20966
TFDP2_3	0.06	-0.02647
TFPT_1	0.21	-0.22976
TFPT_2	-0.03	-0.14066
TFPT_3	0.2	-0.21583
TIGIT_2	0.02	0.02705
TIGIT_3	0.28	-0.04476
TIMM17A	-0.28	-0.14296
TMEM154_1	0.24	-0.10571
TMEM154_2	0.18	0.09576
TMEM154_3	0.25	-0.16457
TMEM176A	0.02	-0.11901
TMEM176B	-0.16	-0.27077
TMEM214	-0.57	-0.25233
TMEM258_1	-1.63	-0.24936
TMEM258_2	-1.87	-0.23615
TMEM258_3	-1.46	-0.20239
Tnfrsf13b	0.11	-0.11548
Tnfrsf17	-0.16	-0.50603
TOB1_1	0.03	0.06861
TOB1_2	0.18	0.21573
TOB1_3	-0.04	0.00222
TRAF2_1	-1.05	-0.14978
TRAF2_2	-0.07	-0.14891
TRAF2_3	-0.03	-0.24022
TRAF2_4	-0.59	-0.15669
TRAM1	-0.2	-0.05543
TRAPPC6B	-0.53	0.02211
TRIM23_1	-0.32	-0.13162
TRIM23_2	-0.25	-0.15319
TRIM23_3	-0.52	-0.1212
TSPAN15_1	0.08	-0.08246
TSPAN15_2	0.23	-0.00421
TSPAN15_3	0.21	-0.23929
TUSC3_1	-0.07	-0.27608
TUSC3_2	-0.14	-0.25457
TUSC3_3	-0.07	-0.10692
TXNDC11	-0.18	0.05352
UBA5	-0.29	-0.1235
UBE2G2	-1.45	-0.28848
UBTF_1	-3.17	0.07674
UBTF_2	-1.04	-0.04908
UBTF_3	-2.05	0.10483
UCHL5_1	0.1	-0.22503
UCHL5_2	-0.06	-0.19212
UCHL5_3	-0.18	-0.16404
UFD1L	-6.08	-0.12029
UGGT1	-0.61	0.14152
UHRF1_1	-0.31	-0.1047
UHRF1_2	0.09	-0.26255
UHRF1_3	-0.13	-0.1278
USF2_1	-0.14	-0.09174
USF2_2	-0.35	-0.09622
USF2_3	-0.25	-0.14296
VCP	-4.15	0.10654
VIMP	-0.43	-0.07539
VSTM4_1	0.19	-0.12473
VSTM4_2	0.24	-0.12012
VSTM4_3	0.27	-0.1433
WBP11_1	-1.01	-0.10535
WBP11_2	-1.02	0.04247
WBP11_3	-1.24	-0.03306
WBP5_1	-0.03	0.05086
WBP5_2	-0.09	-0.04632
WBP5_3	-0.08	-0.00699
Wdfy4_1	-1.62	-0.2577
Wdfy4_2	-1.36	-0.26436
Wdfy4_3	-1.85	-0.21759
WDR76_1	-1.44	-0.08522
WDR76_2	-2.42	-0.12749
WDR76_3	-1.32	-0.04481
WFS1_1	-0.26	-0.34971
WFS1_2	-0.29	-0.27646
WFS1_3	-0.3	-0.06881
WIPI1_1	-0.53	-0.24273
WIPI1_2	-0.42	-0.01911
WIPI1_3	-0.25	-0.0215
WRB	-3.64	0.13886
XBP1_3	0.02	0.04462
XBP1_4	-0.02	-0.03682
XBP1-1	-0.47	-0.07587
XBP1-2	-0.43	-0.04966
YIF1A_1	-0.58	-0.16851
YIF1A_2	-0.53	-0.18641
YIF1A_3	-0.4	-0.14877
YY1_1	-0.36	-0.26593
YY1_2	-0.76	-0.22344
YY1_3	-0.1	-0.21641
ZC3H12D_1	0.17	-0.06319
ZC3H12D_2	0.14	-0.00708
ZC3H12D_3	0.13	-0.08299
ZDHHC20_1	-0.23	0.02087
ZDHHC20_2	-0.17	-0.09223
ZDHHC20_3	-0.05	0.00704
ZFP207_1	-0.32	-0.02414
ZFP207_2	-0.43	0.0359
ZFP207_3	-0.41	0.02956
Zfp36	0.52	0.60613
ZFP367_1	-1.07	-0.1047
ZFP367_2	-0.98	-0.26255
ZFP367_3	-0.84	-0.1278
ZFP64_1	-0.23	0.07253
ZFP64_2	-0.17	-0.01565
ZFP64_3	-0.08	-0.03784

## Sheet: Experiment 2
Legend: the table showing the correlation of survival/proliferation and differentiation scores from experiment #2 as depicted in main Figure 1.
SgRNAs name	Sur/Pro score	Diff score
ABCA1_1	0.12	-0.14985
ABCA1_2	0.13	-0.1693
ABCA1_3	0.23	-0.07189
ACADVL_1	-0.21	-0.11293
ACADVL_2	-0.25	-0.10813
ACADVL_3	-0.26	0.04608
ACKR3_1	0.2	-0.1173
ACKR3_2	0.16	-0.12761
ACKR3_3	0.07	-0.30166
ACTL6A_1	-2.06	-0.35377
ACTL6A_2	-0.02	-0.20417
ACTL6A_3	-1.34	-0.08848
ACTL6B_1	-0.04	-0.13029
ACTL6B_2	-0.09	-0.15406
ACTL6B_3	-0.02	-0.05161
ACTR2_1	-1.62	-0.20021
ACTR2_2	-0.77	-0.12456
ACTR2_3	-1.1	-0.38988
ACTR3_1	-0.87	-0.30867
ACTR3_2	-1.52	-0.39032
ACTR3_3	-1.13	-0.14986
ALG1	-4.47	-0.05171
ALG11	-4.71	0.08518
ALG12	-1.12	-0.33047
ALG14	-3.47	-0.10318
ALG2	-5.02	-0.08402
ALG3	-0.45	-0.18651
ALG5	-0.68	-0.14933
ALG6	-1.4	-0.22451
ALG8	-1.08	-0.27964
ALPL_1	0.18	-0.03899
ALPL_2	0.16	-0.12838
ALPL_3	0.35	-0.13946
ALS2_1	0.05	0.15362
ALS2_2	-0.16	-0.07039
ALS2_3	-0.04	-0.01723
AP1S1	-0.53	-0.01673
AP3D1	-0.7	-0.06723
AP3M1	-0.3	-0.17864
AP3S1	-0.44	-0.19386
AP3S2	-0.37	-0.06998
ARF1_1	-5.34	-0.37884
ARF1_2	-5.71	-0.43018
ARF1_3	-4.06	-0.5466
ARF1_4	-4.25	-0.24442
ARF2_1	0	0.01084
ARF2_2	-0.12	-0.09267
ARF2_3	0.04	0.08432
ARF2_4	0.01	-0.03051
ARF3_1	-0.07	-0.05428
ARF3_2	0	-0.00653
ARF3_3	-0.01	-0.07423
ARF3_4	0.03	-0.00436
ARF4_1	-1.51	-1.21962
ARF4_2	-0.94	-1.1917
ARF4_3	-1.32	-0.94342
ARF5_1	-0.12	0.02558
ARF5_2	0	-0.01607
ARF5_3	-0.02	0.00222
ARF5_4	0.02	0.03424
ARF6_1	0.6	-0.11414
ARF6_2	0.37	-0.11015
ARF6_3	0.35	-0.3836
ARF6_4	0.39	-0.09765
ARFGAP3_1	-0.05	0.07097
ARFGAP3_2	-0.36	0.01414
ARFGAP3_3	-0.25	0.01878
ARHGAP1_1	-1.17	-0.33003
ARHGAP1_2	-1.09	-0.86535
ARHGAP1_3	-0.03	0.14699
ARHGAP10_1	-0.42	-0.13803
ARHGAP10_2	-0.19	-0.1532
ARHGAP10_3	-0.27	-0.20605
ARHGAP11A_1	-0.31	-0.12323
ARHGAP11A_2	-0.3	-0.28264
ARHGAP11A_3	-0.29	-0.22729
ARHGAP12_1	-0.18	-0.07919
ARHGAP12_2	-0.35	-0.17671
ARHGAP12_3	-0.5	0.1894
ARHGAP15_1	-0.28	0.10723
ARHGAP15_2	-0.29	-0.22963
ARHGAP15_3	-0.51	-0.22313
ARHGAP17_1	-0.39	-0.28327
ARHGAP17_2	-0.23	-0.06274
ARHGAP17_3	-0.43	0.01114
ARHGAP18_1	-0.28	-0.02885
ARHGAP18_2	-0.15	-0.26939
ARHGAP18_3	-0.19	-0.11211
ARHGAP19_1	-0.42	-0.25037
ARHGAP19_2	-0.49	-0.01114
ARHGAP19_3	-0.33	-0.04264
ARHGAP21_1	-0.4	0.10878
ARHGAP21_2	-0.19	-0.09516
ARHGAP21_3	-0.4	0.1779
ARHGAP24_1	-0.38	-0.02425
ARHGAP24_2	-0.33	-0.03519
ARHGAP24_3	-0.13	-0.14336
ARHGAP25_1	-0.42	-0.08675
ARHGAP25_2	-0.42	0.05344
ARHGAP25_3	-0.47	0.00452
ARHGAP26_1	-0.29	-0.10445
ARHGAP26_2	-0.53	0.02076
ARHGAP26_3	-0.36	-0.03772
ARHGAP27_1	-0.17	-0.101
ARHGAP27_2	-0.13	-0.03804
ARHGAP27_3	-0.22	-0.09638
ARHGAP29_1	-0.4	0.0145
ARHGAP29_2	-0.24	0.01832
ARHGAP29_3	-0.22	0.14399
ARHGAP30_1	-0.12	-0.01718
ARHGAP30_2	-0.51	-0.35013
ARHGAP30_3	-0.29	-0.11891
ARHGAP32_1	-0.23	-0.30601
ARHGAP32_2	-0.22	-0.05514
ARHGAP32_3	-0.23	-0.15101
ARHGAP4_1	-0.29	0.08029
ARHGAP4_2	-0.18	0.02127
ARHGAP4_3	-0.29	0.1252
ARHGAP8_1	-0.15	0.06319
ARHGAP8_2	-0.34	0.05063
ARHGAP8_3	-0.36	-0.08917
ARHGEF1_1	-0.13	-0.11651
ARHGEF1_2	-0.12	-0.10069
ARHGEF1_3	-0.12	0.32668
ARHGEF11_1	-0.12	0.06413
ARHGEF11_2	-0.31	-0.34465
ARHGEF11_3	-0.37	-0.33859
ARHGEF12_1	-0.31	-0.26187
ARHGEF12_2	-0.39	-0.07134
ARHGEF12_3	-0.31	-0.05987
ARHGEF18_1	-0.34	-0.00618
ARHGEF18_2	-0.3	-0.23331
ARHGEF18_3	-0.49	0.17573
ARHGEF2_1	-0.65	-0.08179
ARHGEF2_2	-0.54	0.0145
ARHGEF2_3	-0.26	-0.06033
ARHGEF3_1	-0.28	0.24998
ARHGEF3_2	-0.17	0.25853
ARHGEF3_3	-0.21	-0.15806
ARID1A_1	-0.8	-0.41328
ARID1A_2	-0.02	-0.24493
ARID1A_3	-0.42	-0.20066
ARID1B_1	-0.16	-0.16059
ARID1B_3	-0.06	-0.11489
ARID2_1	-0.1	0.17223
ARID2_2	-0.4	-0.07387
ARID2_3	-0.1	-0.20209
ARID3A_1	-1.42	-1.17319
ARID3A_2	-1.34	-0.97226
ARID3A_3	-1.07	-1.06744
ARID3B_1	-0.58	-0.23467
ARID3B_2	-0.43	-0.20276
ARID3B_3	-0.29	-0.20423
ARID5A_1	-0.54	-0.22694
ARID5A_2	0.07	0.07786
ARID5A_3	-0.22	-0.16488
ARID5B_1	-0.12	-0.10143
ARID5B_2	-0.15	-0.35348
ARID5B_3	-0.09	-0.33514
ARL1_1	-2.67	0.04149
ARL1_2	-1.3	-0.0485
ARL1_3	-0.94	0.0665
ARL2_1	-2.74	0.1481
ARL2_2	-2.59	-0.13468
ARL2_3	-0.43	-0.09686
ARL2BP_1	-0.36	-0.30405
ARL2BP_2	-0.48	-0.16182
ARL2BP_3	-0.52	-0.01564
ARL3_1	-0.48	-0.1017
ARL3_2	-0.45	0.00389
ARL3_3	-0.59	-0.07995
ARL5A_1	-2	0.02641
ARL5A_2	-1.39	0
ARL5A_3	-1.5	-0.05632
ARL5C_1	-0.33	-0.13828
ARL5C_2	-0.45	-0.0145
ARL5C_3	-0.38	-0.13013
ARL6_1	-0.18	0.10093
ARL6_2	-0.29	0.02032
ARL6_3	-0.22	-0.21896
ARL6IP1_1	-0.6	-0.00341
ARL6IP1_2	-0.56	-0.26603
ARL6IP1_3	-0.47	-0.17606
ARL6IP4_1	-0.53	-0.02346
ARL6IP4_2	-0.85	-0.1335
ARL6IP4_3	-0.39	-0.17816
ARL6IP6_1	-0.52	-0.04614
ARL6IP6_2	-0.43	-0.21988
ARL6IP6_3	-0.72	-0.07858
ARL8A_1	-0.18	0.00341
ARL8A_2	-0.42	-0.11462
ARL8A_3	-0.65	-0.04233
ARL8B_1	-2.98	-0.45904
ARL8B_2	-2.13	-0.07964
ARL8B_3	-2.49	-0.1841
ARMCX3	-0.42	-0.18641
ASNA1	-3.94	-0.26753
ASNS_1	-0.2	0.01192
ASNS_2	-0.41	-0.02509
ASNS_3	-0.25	-0.14456
ATF3	-0.25	-0.07276
ATF4_1	-0.09	-0.3805
ATF4_2	-0.06	-0.39161
ATF4_3	-0.26	-0.24272
ATF4_4	-0.41	-0.38827
ATF6_1	-0.07	0.00243
ATF6_2	-0.13	-0.0764
ATF6_3	0	-0.041
ATF6_4	-0.12	0.02459
ATF6B_1	-0.07	-0.02684
ATF6B_2	0.04	0
ATF6B_3	-0.01	-0.04001
ATF6B_4	0.11	0.0132
AXL_1	0.32	-0.21289
AXL_2	0.13	-0.16568
AXL_3	0.26	-0.33298
BASP1_1	-3.66	-0.07985
BASP1_2	-0.89	-0.22239
BASP1_3	-1.5	-0.13656
BAZ1A_1	-0.06	-0.09668
BAZ1A_2	-0.23	-0.20091
BAZ1A_3	0.43	-0.19222
BAZ1B_1	0.02	-0.20983
BAZ1B_2	-1.1	-0.20565
BAZ1B_3	0.3	-0.19839
BAZ2A_1	-0.22	-0.04898
BAZ2A_2	0.09	-0.04278
BAZ2A_3	0.12	-0.05889
BCAP31	-0.26	-0.0334
BCL11A_1	-0.36	-0.10138
BCL11A_2	-0.6	-0.07039
BCL11A_3	-1.14	-0.04189
BCL11B_1	-0.08	-0.11798
BCL11B_3	0.19	-0.16715
BCL7A_1	0.09	-0.13375
BCL7A_2	-0.06	-0.04754
BCL7A_3	-0.14	-0.15266
BCL7B_1	-0.2	-0.14998
BCL7B_2	-0.03	-0.19643
BCL7B_3	0.11	-0.10692
BCL7C_1	-0.03	-0.02445
BCL7C_2	0	-0.07955
BCL7C_3	-0.28	-0.0628
BET1	-1.78	-0.04493
BFP	0.05	-0.04394
BFP	-0.02	-0.04573
BFP	0.03	-0.05889
BHLHA15_1	0.14	0.0847
BHLHA15_2	0.07	0.05279
BHLHA15_3	0.06	0.0386
BPTF_1	-1.8	-0.24688
BPTF_2	-2.57	-0.14585
BPTF_3	-2.45	-0.1812
BRD2	0.02	-0.152
BRD4	-0.38	0.47179
BRD7_1	-0.48	-0.38434
BRD7_2	0.16	-0.08659
BRD7_3	-0.1	-0.14892
BRD9_1	-0.05	-0.02038
BRD9_2	-0.17	-0.11853
BRD9_3	-0.02	-0.17757
BSG_1	0.26	-0.27837
BSG_2	0.15	-0.20776
BSG_3	0.11	-0.17704
CALM1	0.14	0.6295
CALM2	-0.25	0.32023
CALR_1	-0.21	-0.12252
CALR_2	-0.55	-0.11127
CALR_3	-0.52	-0.01241
CANX	-1.66	-0.04561
CBX4_1	0.21	0.01612
CBX4_2	0.16	0.07588
CBX4_3	0.05	0.15593
CCND2	-0.94	0.27886
CDC42_1	-0.49	0.0107
CDC42_2	-3.15	-0.07892
CDC42_3	-2.52	-0.04975
CDC6	-2.03	-0.0579
CDH17_1	0.18	-0.19071
CDH17_2	0.28	-0.11308
CDH17_3	0.29	-0.13309
CDKN2C	0.68	0.24332
CEBPB	-0.07	0.33798
CERS2_1	-0.59	-0.13606
CERS2_2	-0.36	-0.20091
CERS2_3	-0.39	-0.08927
CHD3_1	-0.18	-0.09311
CHD3_2	-0.07	-0.30713
CHD3_3	-0.17	-0.15318
CHD4_1	-0.04	-0.06859
CHD4_2	-0.21	-0.21057
CHD4_3	0.41	0.17569
CHRAC1_3	0.408	0.176
CHUK_1	-3.07	0.03977
CHUK_2	-1.02	0.0946
CHUK_3	-1.14	0.04064
CHUK_4	-2.21	0.168
CLEC12A_1	0.23	-0.34018
CLEC12A_2	0.15	-0.1216
CLEC12A_3	0.12	-0.30246
CLEC1B_1	0.16	-0.22851
CLEC1B_2	0.14	-0.11948
CLEC1B_3	0.2	-0.11301
CLEC4A1_1	0.34	-0.15878
CLEC4A1_2	0.24	-0.19627
CLEC4A1_3	0.28	-0.39788
CLEC4A2_1	0.12	-0.19506
CLEC4A2_2	0.01	-0.27742
CLEC4A2_3	0.12	-0.14233
CLEC4A3_1	0.25	-0.16629
CLEC4A3_2	0.25	-0.08891
CLEC4A3_3	0.23	-0.27703
CLEC5A_1	0.15	-0.16705
CLEC5A_2	0.28	-0.22971
CLEC5A_3	0.17	-0.10692
CLEC7A_1	0.27	-0.03917
CLEC7A_2	0.13	-0.10171
CLEC7A_3	0.26	-0.37453
CLTB	-0.46	-0.1044
COPA	-3.61	-0.17984
COPB1	-1.92	-0.11321
COPB2	-2.79	-0.17392
COPE	-1.46	-0.05184
COPS2_1	0.13	0.04826
COPS2_2	-0.29	-0.12854
COPS2_3	-0.1	-0.20091
COPZ1	-3.55	0.00931
COPZ2	-0.5	0.01808
CPM_1	0.0418916	-0.0687128
CREB3_1	-0.2	0.01895
CREB3_2	0	-0.03121
CREB3_3	0.32	-0.10124
CREB3L2_1	-0.01	-0.06263
CREB3L2_2	-0.02	-0.11921
CREB3L2_3	0.03	-0.05793
CREG1_1	-0.2	0.04883
CREG1_2	-0.13	-0.08102
CREG1_3	0.14	-0.01529
Creld2	0.49	0.64312
CSF2RB_1	0.24	-0.17201
CSF2RB_2	0.18	-0.14187
CSF2RB_3	0.25	-0.1339
CXXC1_1	-0.99	-0.25154
CXXC1_2	-1.05	-0.27775
CXXC1_3	-1.27	-0.06242
CXXC5_1	-0.05	-0.03312
CXXC5_2	-0.23	-0.01195
CXXC5_3	-0.01	-0.02365
DAD1_1	-1.62	-0.21908
DAD1_2	-0.24	-0.16812
DAD1_3	-2.62	-0.02272
DCP2_1	-0.38	-0.18641
DCP2_2	-0.44	-0.0458
DCP2_3	-0.24	-0.16089
DDIT3_1	-0.1	-0.03401
DDIT3_2	-0.03	-0.08781
DDIT3_3	-0.03	0.07141
DDOST_1	-1.37	-0.26121
DDOST_2	-2.19	-0.24335
DDOST_3	-1.69	-0.29116
DDX11_1	-1.58	-0.30409
DDX11_2	-0.52	-0.07138
DDX11_3	-0.72	0.05624
DERL1	-0.71	-0.06196
DERL3	-0.28	-0.21846
DIRAS2_1	-0.34	-0.02902
DIRAS2_2	-0.26	-0.16958
DIRAS2_3	-0.28	-0.16331
Dis3_1	-1.66	-0.45191
Dis3_2	-3.79	-0.27357
DNAJB11_1	-0.41	-0.34834
DNAJB11_2	-0.35	-0.12899
DNAJB11_3	-0.25	-0.17616
DNAJB9_1	-0.04	-0.13191
DNAJB9_2	-0.42	-0.20469
DNAJB9_3	-0.3	-0.18561
DNAJC1	-0.19	0.03933
DNAJC3_1	-0.55	0.00705
DNAJC3_2	-0.24	-0.10932
DNAJC3_3	-0.9	-0.51197
DOLK	-0.28	-0.03725
DOLPP1	-1.12	-0.11374
DPAGT1	-1.79	-0.14632
DPF1_1	-0.14	-0.31013
DPF1_2	-0.01	-0.21165
DPF1_3	-0.01	-0.1666
DPM1_1	-1.24	-0.6259
DPM1_2	-1.05	-0.6135
DPM1_3	-0.65	-0.61725
DPM3_1	-1.33	-0.56472
DPM3_2	-0.71	-0.59412
DPM3_3	-0.38	-0.59561
EDEM1_1	-0.42	-0.28149
EDEM1_2	-0.56	-0.2332
EDEM1_3	-0.68	-0.25457
EDEM2	-0.56	0.0195
EDEM3	-0.58	0.01616
EGR1	0.14	0.10962
EGR2	-2.69	-0.20091
EIF2A_1	-0.04	-0.3734
EIF2A_2	0.06	-0.30723
EIF2A_3	0.09	-0.30812
EIF2A_4	-0.09	-0.38603
EIF2AK3_1	-0.25	-0.11636
EIF2AK3_2	-0.35	0.02942
EIF2AK3_3	-0.25	0.08563
EIF2AK3_4	-0.19	0.00751
ELK4_1	-0.11	-0.22239
ELK4_2	-0.1	-0.13656
ELK4_3	0.04	-0.15453
ENPP1_1	0.29	-0.11936
ENPP1_2	0.15	-0.16273
ENPP1_3	0.13	-0.14289
ENPP6_1	0.11	-0.34496
ENPP6_2	0.24	-0.15134
ENPP6_3	0.17	-0.2071
ENTPD1_1	0.03	0.05422
ENTPD1_2	0.15	-0.02327
ENTPD1_3	0.05	-0.08126
ERLEC1	-0.43	-0.15569
ERN1_1	-0.83	-1.03736
ERN1_2	-1.37	-1.52462
ERN1_3	-0.98	-0.89823
ERN1_4	-0.69	-1.06538
ERN2_1	0.05	0.03835
ERN2_2	-0.15	0.04788
ERN2_3	0.04	-0.16159
ERN2_4	-0.08	-0.06423
ERO1LB	-0.13	-0.07091
EVC2_1	0.25	-0.30378
EVC2_2	0.2	-0.22562
EVC2_3	0.37	-0.27646
EVI2A_1	0.25	-0.13336
EVI2A_2	0.26	-0.20979
EVI2A_3	0.22	0.09567
EXOC6B	-0.35	-0.06901
FAM46C	-0.24	0.25942
FANCL_1	-1.1	-0.12553
FANCL_2	-2.2	-0.09246
FANCL_3	-0.36	-0.0122
Fas	0.06	-0.01594
FBXW7_1	0.58	0.15593
FBXW7_2	0.57	0.0588
FBXW7_3	0.7	0.15154
FCGRT_1	0.24	-0.22984
FCGRT_2	0.17	-0.05411
FCGRT_3	0.23	-0.49657
FGD2_1	-0.11	0.10692
FGD2_2	-0.17	-0.10692
FGD2_3	-0.16	-0.05726
FGD6_1	-0.35	-0.01815
FGD6_2	-0.06	0.2703
FGD6_3	-0.12	-0.01336
FKBP14_1	-0.43	-0.22103
FKBP14_2	-0.28	-0.15721
FKBP14_3	-0.3	-0.12971
FLI1	-0.04	0.15429
FOS	-0.08	-0.34471
FOSB	-1.12	-0.10836
FUS_1	-0.34	0.11912
FUS_2	-0.06	0.14022
FUS_3	-0.36	0.13347
FUT8	-0.66	-0.23118
G2E3_1	-0.08	-0.07985
G2E3_2	0.3	-0.22239
G2E3_3	0.38	-0.13656
GALNT13	-0.39	-0.14351
GALNT6	-0.51	-0.07108
GANAB	-1.31	-0.02312
GATAD2A_1	-0.28	-0.30222
GATAD2A_2	-0.31	-0.3251
GATAD2A_3	-0.16	-0.16659
GATAD2B_1	-0.09	-0.24968
GATAD2B_2	-0.18	-0.00532
GBF1	-4.29	-0.33213
GFPT1_1	-1.85	-0.24585
GFPT1_2	-4.23	-0.21917
GFPT1_3	-1.92	-0.16873
GLIPR1_1	-0.08	-0.06711
GLIPR1_2	0.14	-0.1193
GLIPR1_3	-0.06	-0.01602
GOSR1	-0.82	-0.22841
GOSR2_1	-2.88	-0.22293
GOSR2_2	-2.66	0.04612
GOSR2_3	-0.38	-0.14107
GPAA1	-0.36	-0.16138
GPM6A_2	0.06	-0.03196
GPM6A_3	0.15	-0.15168
GPR137B_1	0.29	-0.04819
GPR137B_2	0.18	-0.08579
GPR137B_3	0.14	-0.06153
GPR155_1	0.31	-0.32977
GPR155_2	0.25	-0.43776
GPR155_3	0.32	-0.30666
GPR18_1	0.15	-0.08246
GPR18_2	0.25	-0.3059
GPR18_3	0.06	-0.17677
GPR55_1	0.14	-0.12004
GPR55_2	0.2	-0.24489
GPR55_3	0.07	-0.22722
GRAP_1	-0.09	0.02526
GRAP_2	-0.17	0.14836
GRAP_3	-0.39	0.1099
GSK3A_1	-0.31	-0.00861
GSK3A_2	0.22	-0.05063
GSK3A_3	0.08	-0.11301
HBP1_1	0.06	-0.20091
HBP1_2	0.19	-0.30639
HBP1_3	-0.07	-0.24688
HDAC1_1	-0.28	-1.12564
HDAC1_2	0.12	-0.74566
HDAC1_3	-0.28	-1.15555
HDAC2_1	-0.06	-0.20231
HDAC2_2	-0.11	-0.20696
HDAC2_3	-0.02	-0.26754
HDAC7_1	0.04	-0.05016
HDAC7_2	-0.29	-0.04632
HDAC7_3	-0.21	-0.03053
HEPACAM2_1	0.06	-0.18293
HEPACAM2_2	-0.06	-0.10629
HEPACAM2_3	0.21	0.05163
HERPUD1_1	-0.5	-0.02189
HERPUD1_2	-0.82	-0.03899
HERPUD1_3	-0.9	0.03858
HID1_1	0.15	-0.20846
HID1_2	0.11	-0.27367
HID1_3	0.2	-0.34159
HSBP1_1	0.28	0.05207
HSBP1_2	0.18	-0.00259
HSBP1_3	0.04	-0.02335
Hsp90b1	-1.35	-1.0863
HSPA13	-0.66	-0.5385
HSPA5_1	-4.97	0.04278
HSPA5_2	-0.77	-0.17305
HSPA5_3	-1.66	-0.30401
HSPA5_4	-1.57	0.07545
HYOU1_1	-3.26	-0.03469
HYOU1_2	-3.39	-0.32193
HYOU1_3	-2.72	-0.21974
IFT22_1	-0.35	0.04956
IFT22_2	-0.43	-0.11247
IFT22_3	-0.21	0.06457
IGSF6_1	0.18	0.02725
IGSF6_2	0.08	-0.11125
IGSF6_3	0.26	-0.06396
IKBKB_1	-2.92	0.03705
IKBKB_2	-2.08	-0.00242
IKBKB_3	-2.94	-0.06086
IKBKB_4	-3.11	0.10434
IKBKG_1	0.01	-0.27222
IKBKG_2	-3.1	-0.02692
IKBKG_3	-2.45	-0.06669
IKBKG_4	-0.34	-0.1286
IL13RA1_1	0.17	-0.22461
IL13RA1_2	0.17	-0.09085
IL13RA1_3	0.22	-0.09169
IMPDH1	-0.57	-0.14672
INO80_1	-0.28	-0.18277
INO80_2	-0.31	-0.23195
INO80_3	-1.02	-0.01924
INO80B_1	-0.7	-0.28504
INO80B_2	0.15	-0.33096
INO80B_3	-0.05	-0.24685
INO80C_1	-0.7	-0.08233
INO80C_2	0.11	-0.22239
INO80C_3	-0.25	-0.11942
INO80D_1	-0.02	-0.1099
INO80D_2	0.03	-0.1571
INO80D_3	0.05	-0.01143
INO80E_1	-0.11	-0.13874
INO80E_2	0.11	-0.06481
INO80E_3	-0.01	-0.11601
IRAK1	-0.21	0.08917
IRAK2	0	0.12954
IRF1	-0.25	0.20356
IRF2	-0.11	0.01687
IRF2BP2_1	-0.11	0.01707
IRF2BP2_2	-1.05	0.02254
IRF2BP2_3	-1.44	-0.01392
IRF3	-0.08	-0.09089
IRF4_1	-1.68	-1.27302
IRF4_2	-1.44	-1.55169
IRF4_3	-1.98	-2.0268
ISG20_1	0.01	0.04831
ISG20_2	-0.1	0.05116
ISG20_3	0.16	0.05175
ITSN1_1	-0.03	-0.12807
ITSN1_2	-0.17	0
ITSN1_3	-0.02	0.22113
ITSN2_1	-0.41	0.02509
ITSN2_2	-0.37	0.12847
ITSN2_3	-0.49	0.08032
JUN_1	0.12	-0.08612
JUN_2	-0.07	-0.00835
JUN_3	-0.14	0.07964
JUN_4	-0.18	-0.152
JUNB	-1.09	-0.92224
Jund	-0.37	-0.0938
KDELR3_1	-0.23	-0.12645
KDELR3_2	-0.11	-0.15792
KDELR3_3	-0.42	-0.02697
KHSRP_1	-0.81	-0.30718
KHSRP_2	-0.99	-0.20645
KHSRP_3	-0.64	-0.21051
KLF2	0.38	0.20604
KLF4	-0.18	-0.23182
KLF6	0.93	0.93843
KRAS_1	-0.62	-0.23997
KRAS_2	-0.41	-0.18543
KRAS_3	-0.35	-0.20609
LCORL_1	0.2	-0.19986
LCORL_2	0.09	-0.12439
LCORL_3	0.13	-0.1681
LMAN1	-0.54	-0.0677
LMAN2	-0.51	-0.04384
LMNA_1	-0.72	0.11103
LMNA_2	-0.13	0.16601
LMNA_3	-0.4	-0.06542
LRP1_1	0.16	-0.15721
LRP1_2	0.11	-0.04477
LRP1_3	0.26	-0.12601
LRRN3_1	0.19	-0.12071
LRRN3_2	0.28	-0.34885
LRRN3_3	0.25	-0.22027
LY6C1_1	0.17	-0.34958
LY6C1_2	0.05	-0.26003
LY6C1_3	0.23	-0.21783
LY6C2_1	0.05	-0.11518
LY6C2_2	-0.04	-0.24101
LY6C2_3	0.11	-0.17387
LY6D_1	0.18	-0.37458
LY6D_2	0.2	-0.19942
LY6D_3	0.19	-0.33349
LY6K_1	0.01	-0.14152
LY6K_2	0.29	-0.28367
LY6K_3	0.3	-0.30256
MAFF	-0.41	0
MAGT1_1	-0.39	-0.17989
MAGT1_2	-0.25	-0.20217
MAGT1_3	-0.42	-0.27208
MAN1B1	-0.51	-0.08121
MAN1C1	-0.47	-0.0896
MAP2K1_1	0	-0.08121
MAP2K1_2	0.18	-0.0896
MAP2K1_3	0.24	-0.08121
MAP2K1_4	0.07	-0.0896
MAP2K2_1	0.09	-0.08121
MAP2K2_2	0.05	-0.0896
MAP2K2_3	0	-0.08121
MAP2K2_4	0	-0.0896
MAP2K3_1	0	-0.08121
MAP2K3_2	0.1	-0.0896
MAP2K3_3	0.06	-0.08121
MAP2K3_4	0.05	-0.0896
MAP2K4_1	0.01	-0.08121
MAP2K4_2	0.04	-0.0896
MAP2K4_3	0.07	-0.08121
MAP2K4_4	0	-0.0896
MAP2K6_1	0.13	-0.08121
MAP2K6_2	0.04	-0.0896
MAP2K6_3	0	-0.08121
MAP2K6_4	0.06	-0.0896
MAP2K7_1	-0.09	-0.08121
MAP2K7_2	-0.13	-0.0896
MAP2K7_3	0.17	-0.08121
MAP2K7_4	0.09	-0.0896
MAP3K1_1	0.03	-0.08121
MAP3K1_2	0.26	-0.0896
MAP3K1_3	0.13	-0.08121
MAP3K1_4	0.15	-0.0896
MAP3K14_1	-0.5	-0.08121
MAP3K14_2	-0.17	-0.0896
MAP3K14_3	-1.53	-0.08121
MAP3K14_4	-3.17	-0.0896
MAP3K3_1	-0.16	-0.08121
MAP3K3_2	-0.05	-0.0896
MAP3K3_3	0.12	-0.08121
MAP3K3_4	0.11	-0.0896
MAP3K4_1	0.15	-0.08121
MAP3K4_2	0.08	-0.0896
MAP3K4_3	0.16	-0.08121
MAP3K4_4	0.01	-0.0896
MAP3K5_1	0.05	-0.36885
MAP3K5_2	0	-0.35377
MAP3K5_3	0.24	-0.17664
MAP3K5_4	-0.02	-0.31411
MAP3K7_1	-0.81	-0.08121
MAP3K7_2	-0.52	-0.0896
MAP3K7_3	0.13	-0.08121
MAP3K7_4	-1.27	-0.0896
MAPK1_1	-0.07	-0.24712
MAPK1_2	-0.05	-0.36033
MAPK1_3	-0.17	-0.26133
MAPK1_4	-0.04	-0.187
MAPK11_1	-0.07	-0.08121
MAPK11_2	0.14	-0.0896
MAPK11_3	0.02	-0.08121
MAPK11_4	-0.06	-0.0896
MAPK14_1	0.15	-0.82694
MAPK14_2	0.07	-0.95403
MAPK14_3	0.18	-1.16003
MAPK14_4	0.06	-1.43006
MAPK3_1	0.11	-0.08121
MAPK3_2	0.12	-0.0896
MAPK3_3	0.14	-0.08121
MAPK3_4	0.03	-0.0896
MAPK8_1	-0.03	-0.12701
MAPK8_2	-0.03	-0.19299
MAPK8_3	0.06	-0.10143
MAPK8_4	-0.31	-0.1228
MAPK9_1	0.1	-0.08121
MAPK9_2	0.14	-0.0896
MAPK9_3	0.15	-0.08121
MAPK9_4	-0.1	-0.0896
MBD1_1	-0.14	-0.14585
MBD1_2	-0.14	-0.1812
MBD1_3	-0.13	-0.12553
MBD2_1	-0.5	-0.54638
MBD2_2	-0.49	-0.50455
MBD2_3	-0.28	-0.28567
MBD3_1	-0.02	-0.14707
MBD3_2	-0.37	-0.45603
MBD3_3	0.1	-0.19855
MBNL2_1	-0.21	-0.0693
MBNL2_2	0.02	-0.16309
MBNL2_3	0.25	-0.19987
MBTPS1_1	-2.52	-0.11806
MBTPS1_2	-0.92	-0.25165
MBTPS1_3	-2.96	-0.04454
MBTPS1_4	-2.57	-0.0696
MBTPS2_1	-2.5	-0.06041
MBTPS2_2	-4.52	-0.20989
MBTPS2_3	-2.81	-0.0044
MBTPS2_4	-3.25	-0.09567
MCL1	-0.33	-0.00684
MCRS1_1	-2.18	-0.07818
MCRS1_2	0.03	-0.00311
MCRS1_3	-3.84	-0.0634
MEF2A_1	0.22	-0.25462
MEF2A_2	-0.15	-0.09389
MEF2A_3	0.19	-0.07985
MEF2C	-0.94	-0.16812
MGAT1	-0.7	-0.08947
MGAT2	-0.99	-0.17483
MGAT3	-0.52	-0.0357
MGAT4B	-0.36	0.02537
MORF4L2	-0.18	-0.10345
MS4A4C_2	0.21	-0.15619
MS4A4C_3	-0.02	-0.33208
MTA1_1	-0.25	-0.16027
MTA1_2	-0.2	-0.42991
MTA1_3	0	-0.08846
MTA2_1	-0.1	-0.30026
MTA2_2	-0.29	-0.86935
MTA2_3	-0.18	-0.34123
MTA3_1	-0.12	-0.19977
MTA3_2	-0.23	-0.13299
MTA3_3	-0.14	-0.245
Myb	0.08	-0.00476
MYC_1	-2.86	-1.87774
MYC_2	-2.3	-1.15107
MYC_3	-3.09	-1.72192
MYDGF_1	-0.36	-0.07902
MYDGF_2	-0.4	-0.1752
MYDGF_3	-0.15	-0.14202
Mzb1	0.01	-0.03322
NACC2_1	0.17	-0.20565
NACC2_2	-0.05	-0.19839
NACC2_3	0.06	-0.20671
NAPA_2	-2.11	-0.16711
NCOA2_1	-0.04	-0.09246
NCOA2_2	-0.17	-0.0122
NCOA2_3	0.36	-0.09668
NFKB1_1	-0.99	-0.08121
NFKB1_2	-0.95	-0.0896
NFKB1_3	-0.15	-0.08121
NFKB1_4	-0.68	-0.0896
NFKB2_1	-0.61	-0.08121
NFKB2_2	-0.44	-0.0896
NFKB2_3	-0.44	-0.0896
NFKB2_4	-0.65	-0.0896
NFKBIA_1	0.49	-1.45121
NFKBIA_2	0.4	-1.14728
NFKBIA_3	0.44	-1.3235
NFKBIA_4	0.34	-1.34984
NFRKB_1	-0.17	-0.15265
NFRKB_2	0	-0.22132
NFRKB_3	0.08	-0.03419
NFXL1_1	0.14	-0.20091
NFXL1_2	-0.15	-0.19222
NFXL1_3	-0.09	-0.20983
NGLY1	-0.37	-0.19768
NPLOC4	-2.16	0.03505
NR4A1_1	0.09	-0.05701
NR4A1_2	0.22	-0.03703
NR4A1_3	0.09	0.04624
NRAS_1	-0.8	-0.11566
NRAS_2	-0.36	-0.20564
NRAS_3	-0.87	-0.28788
OS9	-0.73	-0.0476
OST4_1	-1.07	-1.8137
OST4_2	-2.46	-0.57037
OST4_3	-0.78	-0.37707
OSTC_1	0.09	-0.51457
OSTC_2	-0.29	-0.59292
OSTC_3	-0.17	-0.47776
P4HB	-0.43	0.07889
PARK2	-0.44	-0.09592
PBRM1_1	-0.04	-0.15978
PBRM1_2	0.04	-0.17031
PBRM1_3	-0.94	-0.03989
PDCD5	-0.58	-0.331
PDIA6_1	-0.41	-0.39788
PDIA6_2	-0.21	-0.3768
PDIA6_3	-0.23	-0.40781
PGAP1_2	0.15	-0.08716
PGAP1_3	0.21	-0.05255
PHF10_1	-0.84	-0.14391
PHF10_2	-0.22	-0.23341
PHF10_3	-0.43	-0.25819
PHF19_1	-1.68	-0.15453
PHF19_2	-2.73	-0.20091
PHF19_3	0.08	-0.30639
Phf6_1	0.94	-0.24688
Phf6_2	0.34	-0.14585
Phf6_3	0.75	-0.1812
PIGB	-0.17	-0.10118
PIGF	-0.32	-0.06427
PIGG	-0.18	-0.01681
PIGK	-0.24	-0.21087
PIGM	-0.4	-0.16623
PIGT	-0.32	-0.11829
PIGZ	-0.46	0.00296
PIK3CD	-0.37	-0.13943
PIK3R1	-1.04	-0.26481
PIM1	-0.01	-0.28391
PIM2	-0.4	-0.642
PLAG1_1	-0.2	-0.05344
PLAG1_2	-0.06	-0.25462
PLAG1_3	-0.13	-0.09389
PLEKHG2_1	-0.59	-0.06904
PLEKHG2_2	-0.22	0.13309
PLEKHG2_3	-0.31	0.13471
PLXNC1_2	-0.06	-0.0657
PLXNC1_3	-0.07	-0.08546
POLE3_1	-0.74	-0.26427
POLE3_2	-0.79	-0.01937
POLE3_3	-0.49	-0.01785
Pomp	-0.94	-0.34676
POMT2	-0.29	-0.09163
POU2AF1_1	-1.83	-1.1304
POU2AF1_2	-1.75	-1.68348
POU2AF1_3	-1.67	-1.28806
POU6F1	-0.26	0.02083
PPP2R5B_1	-0.48	-0.14254
PPP2R5B_2	-0.68	0.00949
PPP2R5B_3	-0.49	-0.29546
Prdm1_1	-0.96	-3.20963
Prdm1_2	-0.67	-2.4926
Prdm1_3	-1.24	-2.70376
Prdx1	-0.24	-0.1689
PRDX2	0.04	0.18382
PRDX3	0.02	-0.1375
PRDX4	-0.12	-0.2478
PREB	-1.74	-0.53533
PRKCD	0.15	-0.07958
PRKD2	-0.4	0.53201
PSIP1_1	-0.34	-0.15453
PSIP1_2	-0.02	-0.20091
PSIP1_3	-0.3	-0.30639
PSMA1	-0.22	0.04401
PSMA2	-2.97	-0.03761
PSMA3	-0.4	-0.06743
PSMA4	-3.61	-0.25517
PSMA5	-3.66	-0.28921
PSMA7	-2.51	-0.09066
PSMB1	-1.89	-0.21555
PSMB11	-0.31	-0.00313
PSMB2	-3.6	-0.04394
PSMB4	-4.75	-0.01936
PSMB5	-0.43	-0.10573
PSMB6	-4.15	0.1633
PSMB7	-0.21	-0.12553
PSMB8	-0.27	-0.07871
PSMB9	-0.47	0.02605
PXDC1_2	0.08	-0.03441
PXDC1_3	0.19	-0.09095
RAB1	0.05	0.02237
RAB14_1	-2.43	-0.19058
RAB14_2	-2.08	0.14306
RAB14_3	-0.52	0.02456
RAB18_1	-0.37	-0.00682
RAB18_2	-0.34	-0.14994
RAB18_3	-0.54	0.00657
RAB19_1	-0.35	-0.0593
RAB19_2	-0.58	0.03562
RAB19_3	-0.32	-0.08037
RAB1A_1	-2.88	0.00721
RAB1A_2	-0.54	-0.06839
RAB1A_3	-0.34	0.01721
RAB21_1	-0.25	-0.2404
RAB21_2	-1.42	0.11548
RAB21_3	-1.37	0.11217
RAB26_1	-0.43	0.05924
RAB26_2	-0.38	-0.26669
RAB26_3	-0.5	-0.17071
RAB28_1	-0.47	0.11048
RAB28_2	-0.7	-0.06116
RAB28_3	-0.49	-0.30678
RAB2A_1	-1.14	-0.15638
RAB2A_2	-1.24	-0.05287
RAB2A_3	-0.55	0
RAB2B_1	-0.42	0.01767
RAB2B_2	-0.56	-0.1922
RAB2B_3	-0.35	-0.07266
RAB30_1	-0.7	0
RAB30_2	-0.38	-0.13327
RAB30_3	-0.43	-0.16834
RAB33B_1	-0.58	0.02298
RAB33B_2	-0.42	0.04155
RAB33B_3	-0.55	-0.10048
RAB35_1	-2.21	-0.08434
RAB35_2	-3.7	-0.14798
RAB35_3	-3.59	-0.18737
RAB37_1	-0.4	-0.01829
RAB37_2	-0.54	0.18355
RAB37_3	-0.58	0
RAB39_1	-0.26	-0.06155
RAB39_2	-0.82	0.05009
RAB39_3	-0.44	-0.15397
RAB39B_1	-0.69	-0.01016
RAB39B_2	-0.29	-0.08153
RAB39B_3	-0.33	-0.0497
RAB3A_1	-0.48	-0.25526
RAB3A_2	-0.36	-0.05297
RAB3A_3	-0.62	0.08295
RAB3B_1	-0.46	-0.00629
RAB3B_2	-0.47	-0.10535
RAB3B_3	-0.42	-0.09341
RAB3D_1	-0.59	-0.07973
RAB3D_2	-0.4	0
RAB3D_3	-0.45	-0.15472
RAB3GAP1_1	-0.92	-0.10487
RAB3GAP1_2	-0.58	-0.21311
RAB3GAP1_3	-0.52	-0.11146
RAB3GAP2_1	-0.47	-0.08004
RAB3GAP2_2	-0.9	-0.19189
RAB3GAP2_3	-0.86	-0.1989
RAB3IP_1	-0.29	-0.0701
RAB3IP_2	-0.36	-0.16928
RAB3IP_3	-0.34	-0.07907
RAB40B_1	-0.28	0.02982
RAB40B_2	-0.55	-0.23758
RAB40B_3	-0.29	0.00822
RAB43_1	-0.32	-0.05389
RAB43_2	-0.4	0.10053
RAB43_3	-0.45	-0.0757
RAB4A_1	-0.36	-0.1025
RAB4A_2	-0.28	-0.14472
RAB4A_3	-0.35	-0.06879
RAB4B_1	-0.49	-0.2784
RAB4B_2	-0.47	0.04544
RAB4B_3	-0.45	-0.17995
RAB5B_1	-0.34	0.03467
RAB5B_2	-0.71	-0.09311
RAB5B_3	-0.31	0.01154
RAB6A_1	-0.58	0.01886
RAB6A_2	-2.94	-0.39437
RAB6A_3	-2.34	-0.1998
RAB6B_1	-0.41	0.0493
RAB6B_2	-0.53	-0.09562
RAB6B_3	-0.38	-0.05722
RAB7_1	-4.23	-0.3311
RAB7_2	-0.25	-0.09336
RAB7_3	-2.03	-0.03109
RAB8A_1	-0.19	-0.03885
RAB8A_2	-0.85	-0.30982
RAB8A_3	-0.28	-0.0229
RAB8B	-0.62	-0.11574
RABAC1	-0.15	0.01937
RABEP2_1	-0.4	-0.2654
RABEP2_2	-0.25	0.01937
RABEP2_3	-0.6	-0.19566
RABGAP1_1	-0.71	0.02308
RABGAP1_2	-0.39	-0.20869
RABGAP1_3	-0.03	0.02965
RABGAP1L_1	-0.14	-0.07573
RABGAP1L_2	-0.2	-0.21558
RABGAP1L_3	-0.47	-0.32435
RABIF_1	-0.51	-0.18345
RABIF_2	-2.63	-0.13124
RABIF_3	-1.53	-0.33134
RABL2_1	-0.49	-0.1113
RABL2_2	-0.22	-0.06105
RABL2_3	-0.4	-0.15812
RABL3_1	-0.77	-0.01288
RABL3_2	-1.22	-0.12873
RABL3_3	-0.14	0.11306
RAC1_1	-0.79	-0.56359
RAC1_2	-0.81	-0.74846
RAC1_3	-0.6	-0.43063
RAC2_1	-0.56	-0.23657
RAC2_2	-0.87	-0.27348
RAC2_3	-0.84	-0.41504
RALA_1	-0.75	-0.11896
RALA_2	-0.71	-0.15656
RALA_3	-0.73	-0.2294
RALGDS_1	-0.35	-0.02303
RALGDS_2	-0.31	-0.11967
RALGDS_3	-0.54	-0.20573
RALGPS2_1	-0.8	-0.12761
RALGPS2_2	-0.56	-0.11201
RALGPS2_3	-0.64	-0.24664
RAN_1	-2.8	-0.11987
RAN_2	-2.23	0.32386
RAN_3	-1.59	-0.19029
RAP1A_1	-0.36	-0.12363
RAP1A_2	-0.56	-0.04204
RAP1A_3	-0.34	-0.13535
RAP1B_1	-0.13	0.00653
RAP1B_2	-0.33	-0.04086
RAP1B_3	-0.53	-0.13161
RAP2B_1	-0.34	-0.12845
RAP2B_2	-0.27	-0.09712
RAP2B_3	-0.4	-0.14539
RAPGEF5_1	-0.11	-0.2645
RAPGEF5_2	-0.39	0.09179
RAPGEF5_3	-0.41	-0.16319
RASL10A_1	-0.39	-0.16905
RASL10A_2	-0.37	-0.06863
RASL10A_3	-0.39	-0.09042
RBBP4_1	-2.06	-0.46882
RBBP4_2	-1.84	-0.2145
RBBP4_3	-0.81	-0.21846
RBBP7_1	-0.58	-0.18101
RBBP7_2	-0.47	-0.07003
RBBP7_3	-0.34	0.01871
REL_1	-3.2	-0.0896
REL_2	-0.8	-0.0896
REL_3	-3.06	-0.0896
REL_4	-0.04	-0.0896
RELA_1	-0.34	-0.0896
RELA_2	0.03	-0.0896
RELA_3	-1.8	-0.0896
RELA_4	-1.23	-0.0896
RELB_1	-0.01	-0.0896
RELB_2	-0.09	-0.0896
RELB_3	-0.15	-0.0896
RELB_4	-0.02	-0.0896
REM2_1	-0.3	-0.08776
REM2_2	-0.31	-0.06214
REM2_3	-0.22	-0.04875
RFT1	-4.62	-0.13468
RHBDF2_1	0.1	-0.07751
RHBDF2_2	0.18	-0.02474
RHBDF2_3	0.19	-0.10467
RHEB_1	-0.59	-0.07433
RHEB_2	-0.57	-0.24364
RHEB_3	-1.65	-0.23928
RHOA_1	-0.19	-0.10379
RHOA_2	-0.52	0.13666
RHOA_3	-0.16	0.32855
Rhob	0.07	0.10452
RHOBTB1_1	-0.48	-0.01931
RHOBTB1_2	-0.6	-0.01862
RHOBTB1_3	-0.56	-0.03148
RHOF_1	-0.12	-0.12057
RHOF_2	-0.29	-0.08269
RHOF_3	-0.17	-0.13317
RHOG_1	-0.46	-0.13551
RHOG_2	-0.95	0.06153
RHOG_3	-0.8	-0.04713
RHOH_1	-1.69	-0.20091
RHOH_2	-1.76	-0.05315
RHOH_3	-2.06	-0.03317
RHOQ_1	-0.37	-0.14425
RHOQ_2	-0.32	0
RHOQ_3	-0.32	-0.3155
RHPN2	-0.27	-0.00626
RIT2_1	-0.53	-0.10899
RIT2_2	-0.68	-0.1784
RIT2_3	-0.36	-0.25089
RNF5	-0.36	0.04485
Rosa26	-0.03	-0.04809
Rosa26	-0.09	-0.05344
Rosa26	0.08	-0.08763
RPN1_1	-1.24	-0.22302
RPN1_2	-3.09	0.03917
RPN1_3	-3.93	-0.20091
RPN2_1	-1.33	-0.22207
RPN2_2	-1.79	-0.22407
RPN2_3	-2.17	-0.20091
RPS6KA4_1	0.15	-0.13551
RPS6KA4_2	0.1	0.06153
RPS6KA4_3	-0.04	-0.13551
RPS6KA4_4	-0.09	0.06153
RRAD_1	-0.52	-0.08489
RRAD_2	-0.36	-0.01438
RRAD_3	-0.55	0.04215
RRAS2_1	-1.93	-0.24336
RRAS2_2	-1.51	-0.07545
RRAS2_3	-1.74	-0.40946
RRBP1	-0.68	-0.01707
RUVBL1_1	-2.74	-0.1762
RUVBL1_2	-5.06	-0.36671
RUVBL1_3	-0.29	-0.16227
RUVBL2_1	-1.32	-0.05711
RUVBL2_2	-2.4	-0.3202
RUVBL2_3	-3.18	-0.38574
S100a8	-1.01	-0.4636
S100a9	-0.03	0.27428
SAR1A_1	-0.09	-0.14797
SAR1A_2	0	-0.03804
SAR1A_3	0.03	-0.05912
SAR1A_4	-0.07	0.01296
SAR1B_1	0.04	-0.038
SAR1B_2	0.05	0.02726
SAR1B_3	0.13	-0.09371
SAR1B_4	0.12	-0.05427
SCD1_1	-0.03	-0.27472
SCD1_2	-0.11	-0.28247
SCD1_3	0.04	-0.26165
SEC11A	-0.49	0.01866
SEC11C	-0.46	-0.02448
SEC13	-0.23	-0.04432
SEC16A	-1.35	0.01176
SEC22B	-0.85	-0.33257
SEC23A	-0.25	0.04226
SEC24A	-0.41	-0.07387
SEC31A_1	-2.26	0.01302
SEC31A_2	-0.35	-0.31923
SEC31A_3	-4.26	-0.21328
SEC61A1_1	-2.08	-0.56838
SEC61A1_2	-2.63	-0.77391
SEC61A1_3	-1.68	-0.39899
SEC61B_1	-0.63	-0.43661
SEC61B_2	-0.12	-0.13445
SEC61B_3	-1.36	-0.35965
SEC61G	-1.76	-0.20282
SEC62	-1.64	-0.32478
SEC63	-1.47	-0.31046
SEL1L	-3.42	-0.62394
SEMA7A_1	0.03	-0.12771
SEMA7A_2	0.1	-0.11366
SEMA7A_3	0.13	-0.03146
SERP1_1	-0.53	0
SERP1_2	-0.41	-0.10768
SERP1_3	-0.39	0.02106
SIL1	-0.25	-0.07571
SLAMF7_1	0.23	-0.16706
SLAMF7_2	0.32	-0.10407
SLAMF7_3	0.34	-0.15456
SLAMF9_1	0.23	-0.16522
SLAMF9_2	0.13	-0.22548
SLAMF9_3	0.3	-0.39008
SLC41A1_1	0.24	-0.04284
SLC41A1_2	0.16	-0.22067
SLC41A1_3	0.33	-0.22732
SMARCA1_1	-0.2	-0.14879
SMARCA1_2	-0.09	-0.05924
SMARCA1_3	-0.22	-0.23085
SMARCA2_1	-0.12	-0.20786
SMARCA2_2	-0.29	0.03541
SMARCA2_3	-0.17	-0.24748
SMARCA4_1	-2.64	-0.50394
SMARCA4_2	-4.06	-0.24045
SMARCA4_3	-2.84	-0.56219
SMARCA5_1	-0.79	0.02774
SMARCA5_2	-1	-0.25364
SMARCA5_3	-0.71	-0.27501
SMARCB1_1	-2.06	-0.0034
SMARCB1_2	-2.74	-0.47053
SMARCB1_3	-1.29	-0.27599
SMARCC1_1	-1.32	-0.27615
SMARCC1_2	-1.51	-0.28293
SMARCC1_3	-0.27	-0.22239
SMARCC2_1	-0.64	-0.09568
SMARCC2_2	-0.17	-0.39088
SMARCC2_3	-0.34	-0.01134
SMARCD1_1	-0.14	-0.07056
SMARCD1_2	-0.12	-0.17258
SMARCD1_3	0.14	-0.05806
SMARCD2_1	-0.32	-0.21681
SMARCD2_2	-0.97	-0.45021
SMARCD2_3	-1.47	-0.6833
SMARCD3_1	-0.27	-0.14498
SMARCD3_2	-0.14	-0.17333
SMARCD3_3	-0.15	-0.04284
SMARCE1_1	-1.29	-0.23422
SMARCE1_2	-1.36	-0.12374
SMARCE1_3	-1.29	-0.2585
SORL1_1	0.15	-0.00554
SORL1_2	0.14	-0.04679
SORL1_3	0.18	-0.18518
Sox4	0.07	-0.21759
SP140_1	-0.13	-0.15453
SP140_2	0.24	-0.20091
SP140_3	-0.02	-0.30639
SP3_1	0.03	-0.87903
SP3_2	0.07	-0.95025
SP3_3	0.2	-0.98346
SPCS1	-0.63	-0.15467
SPCS2	-1.86	-0.31586
SPCS3_1	0.05	-0.28011
SPCS3_2	-1.11	-0.52254
SPCS3_3	-0.93	-0.53119
SPTY2D1	-0.19	-0.10545
SRP14	-2.1	-0.25773
SRP19	-0.3	-0.03756
SRP68	-0.82	-0.19803
SRP72	-1.01	-0.48938
SRPR_1	-1.2	-0.50082
SRPR_2	-0.35	-0.14632
SRPR_3	-1.01	-0.25436
SRPRB_1	-1.53	-0.17116
SRPRB_2	-1.49	-0.24814
SRPRB_3	-1.97	-0.26362
SS18_1	-0.2	-0.16773
SS18_2	-0.2	-0.10218
SS18_3	-0.4	-0.17616
SSR1_1	-0.65	-0.01618
SSR1_2	-1.92	-0.16822
SSR1_3	-0.97	-0.37932
SSR2	-1.17	-0.22187
SSR3	-0.36	-0.06233
SSR4	-0.41	-0.00932
STAT1_1	-0.23	-0.13551
STAT1_2	-0.08	0.06153
STAT1_3	0.06	-0.13551
STAT1_4	-0.07	0.06153
STAT3_1	-0.92	-0.75401
STAT3_2	-0.67	-0.2863
STAT3_3	-1.06	-0.5088
STAT3_4	-0.44	-0.67623
STAT5B	-0.12	-0.12041
STT3A_1	-0.44	-0.59623
STT3A_2	-0.2	-0.57531
STT3A_3	-0.2	-0.56071
STT3B_1	-1.23	-0.29263
STT3B_2	-0.97	-0.32987
STT3B_3	-0.92	-0.23621
STX11	-0.38	-0.16959
STX12	-0.49	-0.06366
STX18	-2.24	-0.06787
SYVN1_1	-2.79	-0.13162
SYVN1_2	-2.51	-0.20707
SYVN1_3	-2.15	-0.01581
TACSTD2_2	0.06	-0.00273
TACSTD2_3	0.19	-0.03492
TAF10_1	-1.26	-0.04527
TAF10_2	-1.02	0.11793
TAF10_3	-0.28	-0.05071
TAOK1_1	0.19	0.11793
TAOK1_2	0.14	0.11793
TAOK1_3	0.09	0.11793
TAOK1_4	0.1	-0.05157
TAOK3_1	-0.29	-0.30672
TAOK3_2	-0.18	-0.44381
TAOK3_3	-0.29	-0.43155
TAOK3_4	-0.07	-0.47114
Tcf19_1	-0.52	-0.12553
Tcf19_2	-1.67	-0.09246
Tcf19_3	0.63	-0.0122
TCF3_1	-0.13	-0.74263
TCF3_2	0.22	-0.75759
TCF3_3	0.1	-0.43446
TCF4	-0.79	-0.30701
Tcl1b3	-0.14	-0.19338
TFDP2_1	-0.14	-0.07985
TFDP2_2	0.13	-0.22239
TFDP2_3	0.32	-0.13656
TFPT_1	0.08	-0.00351
TFPT_2	-0.18	-0.0074
TFPT_3	0.07	-0.05745
TIGIT_2	0.09	-0.134
TIGIT_3	0.29	-0.201
TIMM17A	-0.33	-0.17088
TMEM154_1	0.26	-0.01111
TMEM154_2	0.22	-0.03083
TMEM154_3	0.32	-0.37764
TMEM176A	-0.3	0.08504
TMEM176B	-0.07	-0.06221
TMEM214	-0.25	-0.11793
TMEM258_1	-2.01	-0.21759
TMEM258_2	-1.99	-0.26092
TMEM258_3	-1.7	-0.24831
Tnfrsf13b	-0.21	-0.04064
Tnfrsf17	-0.21	-0.07696
TOB1_1	-0.02	-0.00551
TOB1_2	0.06	0.04322
TOB1_3	-0.16	0.01855
TRAF2_1	-0.89	-0.32091
TRAF2_2	-0.25	-0.01285
TRAF2_3	0.07	-0.11335
TRAF2_4	-0.38	-0.23617
TRAM1	-0.29	-0.11424
TRAPPC6B	-0.56	-0.08782
TRIM23_1	-0.18	-0.01346
TRIM23_2	-0.27	0.09085
TRIM23_3	-0.25	-0.07635
TSPAN15_1	0.06	-0.04488
TSPAN15_2	0.05	-0.15656
TSPAN15_3	0.17	-0.17165
TUSC3_1	-0.19	-0.32527
TUSC3_2	-0.12	-0.28201
TUSC3_3	-0.14	-0.2447
TXNDC11	-0.21	-0.16169
UBA5	-0.4	-0.10033
UBE2G2	-1.69	-0.37113
UBTF_1	-2.6	-0.07898
UBTF_2	-1.19	-0.03237
UBTF_3	-2.26	-0.07869
UCHL5_1	-0.2	-0.20091
UCHL5_2	-0.2	-0.21986
UCHL5_3	-0.1	0.00974
UFD1L	-4.32	0
UGGT1	-0.58	0.08299
UHRF1_1	0.1	-0.05344
UHRF1_2	-0.21	-0.25462
UHRF1_3	-0.23	-0.09389
USF2_1	-0.03	-0.11568
USF2_2	-0.28	-0.03064
USF2_3	-0.11	-0.15092
VCP	-4.02	0
VIMP	-0.19	-0.06578
VSTM4_1	0.13	-0.15966
VSTM4_2	0.25	-0.09691
VSTM4_3	0.23	-0.03562
WBP11_1	-1.01	0.01699
WBP11_2	-1.1	0.01195
WBP11_3	-1.5	0.0098
WBP5_1	0.11	0.09719
WBP5_2	-0.05	0.00949
WBP5_3	-0.37	-0.10151
Wdfy4_1	-2.77	-0.09668
Wdfy4_2	-0.81	-0.20091
Wdfy4_3	-1.99	-0.19222
WDR76_1	-1.47	-0.20983
WDR76_2	-2.99	-0.20565
WDR76_3	-0.73	-0.19839
WFS1_1	-0.49	-0.39079
WFS1_2	-0.33	-0.02995
WFS1_3	-0.46	-0.14336
WIPI1_1	-0.33	-0.22178
WIPI1_2	-0.21	-0.16245
WIPI1_3	-0.25	-0.07682
WRB	-4.16	-0.04562
XBP1_3	-0.15	0.0638
XBP1_4	-0.04	-0.03684
XBP1-1	-0.42	-0.16608
XBP1-2	-0.54	-0.10833
YIF1A_1	-0.51	-0.1592
YIF1A_2	-0.34	-0.20881
YIF1A_3	-0.43	-0.19056
YY1_1	-0.69	0.00305
YY1_2	-1.06	0.02576
YY1_3	-0.81	-0.16919
ZC3H12D_1	0.3	-0.06047
ZC3H12D_2	0.2	-0.1682
ZC3H12D_3	0.31	-0.00243
ZDHHC20_1	-0.13	-0.04501
ZDHHC20_2	-0.18	0.05772
ZDHHC20_3	-0.12	0.0446
ZFP207_1	-0.15	0.02904
ZFP207_2	-0.72	0.09505
ZFP207_3	-0.58	-0.06274
Zfp36	0.4	0.94402
ZFP367_1	-1.13	-0.05344
ZFP367_2	-0.88	-0.25462
ZFP367_3	-0.34	-0.09389
ZFP64_1	-0.24	0.03018
ZFP64_2	-0.13	0
ZFP64_3	0.11	0.05036

## Sheet: 133 genes for survival
Genes affecting to B cell survival or proliferation
Actl6a
Actr2
Actr3
Alg1
Alg11
Alg12
Alg14
Alg2
Alg6
Alg8
Arf1
Arf4
Arhgap1
Arid3a
Arl1
Arl2
Arl5a
Arl8b
Asna1
Basp1
Bcl11a
Bet1
Bptf
Canx
Cdc42
Cdc6
Chuk
Copa
Copb1
Copb2
Cope
Copz1
Cxxc1
Dad1
Ddost
Ddx11
Dis3
Dpagt1
Dpm1
Dpm3
Egr2
Ern1
Fancl
Ganab
Gbf1
Gfpt1
Gosr2
Hsp90b1
Hspa5
Hyou1
Ikbkb
Ikbkg
Ino80
Irf2bp2
Irf4
Map3k14
Map3k7
Mbtps1
Mbtps2
Mcrs1
c-Myc
Napa
Nploc4
Ost4
Phf19
Pik3r1
Pou2af1
Preb
Psma2
Psma4
Psma5
Psma7
Psmb1
Psmb2
Psmb4
Psmb6
Rab14
Rab1a
Rab21
Rab2a
Rab35
Rab6a
Rab7
Rabif
Rabl3
Ran
Rbbp4
Rel
Rela
Rft1
Rheb
Rhoh
Rpn1
Rpn2
Rras2
Ruvbl1
Ruvbl2
Sec16a
Sec31a
Sec61a1
Sec61b
Sec61g
Sec62
Sec63
Sel1l
Smarca4
Smarca5
Smarcb1
Smarcc1
Smarce1
Spcs2
Spcs3
Srp14
Srp72
Srpr
Srprb
Ssr1
Ssr2
Stat3
Stt3b
Stx18
Syvn1
Taf10
Tmem258
Ube2g2
Ubtf
Ufd1l
Vcp
Wbp11
Wdfy4
Wdr76
Wrb
Zfp367

## Sheet: 24 genes for PB formation
Genes affecting PB formation
Irf4
c-Myc
Pou2af1
Prdm1
Sp3
Tcf3
Stat3
Hdac1
Mbd2
Mta2
Arid3a
Smarca4
Ern1
Hsp90b1
Arf4
Preb
Ost4
Ostc
Stt3a
Dpm1
Dpm3
Pim2
Nfkbia
Mapk14
